1 Imputed genomes and haplotype-based analyses of the Picts of early  
2 medieval Scotland reveal fine-scale relatedness between Iron Age,  
3 early medieval and the modern people of the UK.

4 Early medieval Pictish genomes reveal fine-scale relatedness in the  
5 UK.

6 Adeline Morez<sup>1\*</sup>, Kate Britton<sup>2,3</sup>, Gordon Noble<sup>2</sup>, Torsten Günther<sup>4</sup>, Anders Götherström<sup>5</sup>, Ricardo  
7 Rodríguez-Varela<sup>5</sup>, Natalija Kashuba<sup>6</sup>, Rui Martiniano<sup>1</sup>, Sahra Talamo<sup>3,7</sup>, Nicholas J. Evans<sup>2</sup>, Joel D.  
8 Irish<sup>1</sup>, Christina Donald<sup>8</sup>, Linus Girdland-Flink<sup>1,2\*</sup>

9 <sup>1</sup> School of Biological and Environmental Sciences, Liverpool John Moores University, Liverpool, UK

10 <sup>2</sup> Department of Archaeology, School of Geosciences, University of Aberdeen, Aberdeen, UK

11 <sup>3</sup> Department of Human Evolution, Max Planck Institute for Evolutionary Anthropology, Deutscher  
12 Platz 6, Leipzig, 04103, Germany

13 <sup>4</sup> Department of Organismal Biology, Uppsala University, Uppsala, Sweden

14 <sup>5</sup> Department of Archaeology and Classical Studies, Stockholm University, Stockholm, Sweden

15 <sup>6</sup> Department of Archaeology and Ancient History, Uppsala University, Uppsala, Sweden

16 <sup>7</sup> Department of Chemistry, University of Bologna, Bologna, Italy

17 <sup>8</sup> The McManus: Dundee's Art Gallery and Museum, Dundee, UK

18 \*Corresponding authors

19 E-mail: [adelinemorez@gmail.com](mailto:adelinemorez@gmail.com) (AM), [linus.girdlandflink@abdn.ac.uk](mailto:linus.girdlandflink@abdn.ac.uk) (LGF)

20

## 21 **Abstract**

22 The origins and ancestry of the Picts of early medieval Scotland (*ca.* AD 300-900) has been traditionally  
23 seen as a problem, prompted in part by exotic medieval origin myths, their enigmatic symbols and  
24 inscriptions, and the meagre textual evidence. The Picts, first mentioned in the late 3<sup>rd</sup> century AD  
25 resisted the Romans and went on to form a powerful kingdom that ruled over a large territory in  
26 northern Britain. In the 9<sup>th</sup> and 10<sup>th</sup> centuries Gaelic language, culture and identity became dominant,  
27 transforming the Pictish realm into Alba, the precursor to the medieval kingdom of Scotland. To date,  
28 no comprehensive analysis of Pictish genomes has been published, and questions about their  
29 biological relationships to other cultural groups living in Britain remain unanswered. Here we present  
30 two high-quality Pictish genomes (2.4 and 16.5X coverage) from central and northern Scotland dated  
31 from the 5<sup>th</sup>-7<sup>th</sup> century which we impute and co-analyse with >8,300 previously published ancient  
32 and modern genomes. Using allele frequency and haplotype-based approaches, we can firmly place  
33 the Pictish genomes within the Iron Age gene pool in Britain and demonstrate local biological affinity.  
34 We also demonstrate the presence of population structure within Pictish groups, with Orcadian Picts  
35 being genetically distinct from their mainland contemporaries. When investigating Identity-By-  
36 Descent (IBD) with present-day genomes, we observe broad affinities between the mainland Pictish  
37 genomes and the present-day people living in western Scotland, Wales, Northern Ireland and  
38 Northumbria, but less with the rest of England, the Orkney islands and eastern Scotland - where the  
39 political centres of Pictland were located. The pre-Viking Age Orcadian Picts evidence a high degree of  
40 IBD sharing across modern Scotland, Wales, Northern Ireland, and the Orkney islands, demonstrating  
41 substantial genetic continuity in the Orkney for the last ~2,000 years. Analysis of mitochondrial DNA  
42 diversity at the Pictish cemetery of Lundin Links (*n* = 7) reveals absence of female endogamy, with  
43 implications for broader social organisation. Overall, our study provides novel insights into the genetic  
44 affinities and population structure of the Picts and direct relationships between ancient and present-  
45 day groups of the UK.

## 46 Introduction

47 The genetic origins of the present-day populations of the UK have been extensively studied and can  
48 broadly be modelled as a mixture of three deep genetic ancestries, mirroring western European  
49 ancestry: western European Mesolithic hunter-gatherer ancestry, Early European farmer ancestry  
50 derived from Anatolian Neolithic farmers, and Late Neolithic Yamnaya-like ancestry (1–10). Our  
51 understanding of more recent demographic changes in the British Isles has also been expanded via  
52 large-scale sequencing of ancient genomes, revealing extensive gene flow from mainland Europe into  
53 southern Britain during the Middle Bronze Age, which contributed to genetic differentiation between  
54 Iron Age groups from southern and northern Britain (9,10). Present-day genetic diversity in Wales,  
55 Cornwall, Devon and western Ireland indicates a long-standing genetic structure, possibly already  
56 present during the Iron Age (11), but the lack of ancient samples especially from Scotland limits our  
57 ability to directly test this hypothesis, and ‘pockets’ of older ancestries could have survived regionally  
58 in isolated populations for extended periods (12,13).

59 The British Isles witnessed a complex cultural turnover from the Iron Age to the early medieval period.  
60 The Romans occupied part of Britain to southern Scotland from AD 43 to *ca.* AD 410; however, this  
61 occupation resulted in little detectable gene flow from mainland Europe (14). Multiple episodes of  
62 long-distance migration across western and central Eurasia (9,15,16) intensified during the Late  
63 Antique period (*ca.* 300-800), before and following the collapse of the Western Roman Empire. In the  
64 British Isles, Angles, Saxons and other Germanic-speaking peoples, likely originating in Scandinavia,  
65 the Low Countries and parts of Germany, settled predominantly in south-eastern and central Britain  
66 with genetic evidence of extensive admixture with local populations carrying genetic ancestry from  
67 the Iron Age (14,17). During the so-called ‘Viking Age’ (starting about AD 800), Scandinavians settled  
68 in the ‘Danelaw’ in northern and eastern England, as well as in the coastal areas of Ireland and  
69 northern and western Britain (18), which led to admixture with the inhabitants of Ireland and western  
70 and northern Britain over nearly four centuries (9). In addition, local, culturally distinct groups lived in

71 Britain around the end of the Roman period, before major Anglo-Saxon settlement: the Britons  
72 (speaking the ancestral language of Welsh, as well as Latin) inhabited the island south of the Firth of  
73 Forth, the Gaels (Dál Riata) occupied Argyll and the southern Hebrides in Scotland, and the Picts lived  
74 in the rest of Britain north of the Forth (19,20). The genetic diversity between and within these groups  
75 is poorly understood. In particular, the lack of genomes from Scotland has limited our ability to  
76 understand how the genetic structure changed between the Iron Age and the early medieval period.

77 Among the peoples present during the first millennium AD in the British Isles, the Picts (*ca.* AD 300-  
78 900) are one of the most enigmatic. Their unique cultural features (e.g. Pictish symbols) and the  
79 scarcity of direct writing resulted in many diverse hypotheses about their origin, lifestyle and culture,  
80 the so-called ‘Pictish problem’ (21). Other than a list of kings and difficult-to-decipher ogham and  
81 alphabetic inscriptions, the only written evidence comes to us from their neighbours – the Romans  
82 and later the Gaels, Britons and Anglo-Saxons. This deficiency has been compounded by a sparse  
83 archaeological record with few settlements and fewer cemeteries from this period (22).

84 In the modern era perceptions of Pictish origins have varied, often according to cultural and political  
85 biases, with the Picts and their languages regarded as Germanic, Gaelic, Brittonic, Basque, and Illyrian,  
86 among other theories. In the 1950s Jackson influentially argued that the Picts spoke a non-Indo-  
87 European language and a Celtic language akin to ancient Gaulish (23,24). The current consensus is that  
88 they spoke a Celtic language closest to that of neighbouring Britons from which Cornish, Welsh, and  
89 Breton derive (25–27). However, some still argue from undeciphered inscriptions and other words  
90 that some Picts spoke an otherwise unknown language, presumably derived from a pre-Celtic  
91 population (28,29). Thus, the question remains of whether the Picts were somehow fundamentally  
92 different from their neighbours.

93 In the medieval period, the Picts were considered immigrants from Thrace (north of the Aegean Sea),  
94 Scythia (eastern Europe), or isles north of Britain (30). However, Irish accounts and the Northumbrian  
95 scholar Bede added that, before settling in Britain, the Picts first gained wives in Ireland, on the

96 condition that Pictish succession passed through the female line. This is the origin of the theory that  
97 the Picts practised a form of matriliney, with succession and perhaps inheritance going to the sister's  
98 son rather than directly through the male line. However, our earliest source for this practice, Bede's  
99 'Ecclesiastical History of the English People' (finished in AD 731), stated that it was limited to occasions  
100 when the succession was in dispute. It is now argued that the origin-legend was intended to reinforce  
101 Pictish identity and legitimise particular kings whose claims to the throne were through their mothers  
102 (31,32). Nevertheless, matriliney remains one potential explanation for the absence of father-to-son  
103 succession in at least one Pictish royal dynasty before the mid-8<sup>th</sup> century (33).

104 Here, we aim to provide new insights into the genetic diversity of the Picts through analysis of two  
105 ancient whole genomes (2.4 and 16.5X coverage) sequenced from individuals excavated from two  
106 Pictish-era cemeteries: Lundin Links (Fife, Southern Pictland) and Balintore (Easter Ross, Northern  
107 Pictland). We imputed diploid genotypes alongside published medium-to-high coverage ancient  
108 genomes, including individuals from England dating from the Iron Age, Roman and early medieval  
109 periods (14,17) and co-analysed these with previously imputed ancient genomes from the Orkney  
110 islands dating from the Late Iron Age (Pictish period) and Viking Age (9). Using allele frequency and  
111 haplotype-based methods, we aim to determine the genetic relationships between the Picts and  
112 neighbouring modern-day and ancient populations. In addition, using the mitogenomes of seven  
113 individuals from Lundin Links, we will explore how differences in female mobility due to possible post-  
114 marital residence customs, i.e., matrilocality (female endogamy), may have shaped the genetic  
115 diversity at this possible high-status cemetery and discuss its implication for our understanding of  
116 Pictish elite descent systems.

## 117 **Results and discussion**

### 118 **DNA extraction, sequencing, and radiocarbon dating**

119 We retrieved DNA from eight individuals, one from Balintore (Easter Ross) and seven from Lundin  
 120 Links (Fife), representing the northern and southern parts of Pictland (Fig 1, Table 1, S1 Table, S1.1  
 121 Text). Two individuals, BAL003 and LUN004 were treated with the USER enzyme to remove post-  
 122 mortem deamination (34) and were shotgun sequenced to medium and high coverage (2.4 and 16.5X)  
 123 (Table 1, S1 Table). Seven individuals from Lundin Links were shotgun sequenced to a sufficient  
 124 mitochondrial DNA (mtDNA) coverage for subsequent analyses (3.47-195.05X, Table 1). LUN001 and  
 125 LUN003 are excluded from the population genetics analysis involving autosomal DNA as we found  
 126 evidence for library index misassignment in the autosomal data, but not the mitochondrial data (S1.2  
 127 Text). Ten samples from Lundin Links (including LUN001, LUN002, LUN003 and LUN009) and three  
 128 from Balintore were radiocarbon dated to the 5<sup>th</sup>-7<sup>th</sup> century AD (Table 1, S2 Fig, S4 Table, S1.1 Text)  
 129 (35). The individuals will be referred to as Pictish throughout the text as they lived during the period  
 130 that Pictish identity existed and are from areas likely to have been within Pictish territories *ca.* AD 700.

131

132 **Fig 1. Sampling location and the regions under ancient Brittonic, Irish and Anglo-Saxon control**  
 133 **around the 7<sup>th</sup> century (36–38).**

134

135 **Table 1. Summary information from the eight samples investigated in this study.**

| Sample | Site            | Radiocarbon<br>calibrated<br>date (95.4%<br>confidence,<br>AD) | Genome<br>coverage<br>(X) | mtDNA<br>Coverage<br>(X) | Sex | mtDNA / Y<br>haplogroup | Contamination Estimate (%) |               |               |
|--------|-----------------|----------------------------------------------------------------|---------------------------|--------------------------|-----|-------------------------|----------------------------|---------------|---------------|
|        |                 |                                                                |                           |                          |     |                         | Based on<br>mtDNA          | Based<br>on X | Based<br>on Y |
| BAL003 | Balintore       | 419 - 538                                                      | 16.54                     | 294.97                   | XX  | H2a1e                   | 1.00 ±<br>1.00             | -             | 0.30          |
| LUN001 | Lundin<br>Links | 416 - 545                                                      | 0.18                      | 195.05                   | XX  | T2a1a                   | 2.00 ±<br>1.00             | -             | 3.78          |

|        |        |           |                       |        |    |              |        |        |      |
|--------|--------|-----------|-----------------------|--------|----|--------------|--------|--------|------|
| LUN002 | Lundin | 563 - 653 | $2.24 \times 10^{-3}$ | 3.47   | -  | H1c20        | 1.00 ± | -      | -    |
|        | Links  |           |                       |        |    |              | 1.00   |        |      |
| LUN003 | Lundin | 384 - 562 | 0.32                  | 154.31 | XX | T2b11        | 2.00 ± | -      | 1.70 |
|        | Links  |           |                       |        |    |              | 1.00   |        |      |
| LUN004 | Lundin | -         | 2.43                  | 121.32 | XY | J1c3g / R1b- | 1.00 ± | 0.80 ± | -    |
|        | Links  |           |                       |        |    | L52          | 1.00   | 0.10   |      |
| LUN005 | Lundin | -         | $7.02 \times 10^{-3}$ | 3.99   | XY | K1c2         | 1.00 ± | -      | -    |
|        | Links  |           |                       |        |    |              | 1.00   |        |      |
| LUN006 | Lundin | -         | $1.48 \times 10^{-3}$ | 8.13   | -  | J1c3b1       | 2.00 ± | -      | -    |
|        | Links  |           |                       |        |    |              | 1.00   |        |      |
| LUN009 | Lundin | 430 - 590 | $6.11 \times 10^{-3}$ | 4.26   | XX | J1c3b        | 1.00 ± | -      | 0.59 |
|        | Links  |           |                       |        |    |              | 1.00   |        |      |

136

137 All samples evidenced deamination patterns at the fragment termini characteristic of ancient DNA  
 138 (aDNA), except BAL003 and LUN004 which underwent damage repair enzymatic treatment, for which  
 139 the respective unrepaired screening libraries BAL003-b1e1l1 and LUN004-b1e1l1 did show  
 140 deamination (S3 Fig). Contamination estimates based on mtDNA, X and Y-chromosome reads are low  
 141 (Table 1, S1 Table, S1.3 Text). The genetic sex determination (S4 Fig) agrees with the morphological  
 142 sex determination (Table 1, S1 Table).

## 143 **Demographic history**

### 144 **Analysis of uniparental genetic markers**

145 The mitochondrial haplogroups observed in the samples are common in present-day north-western  
 146 Europeans, with the sub-clade J1c3 being identified in three individuals out of eight (Table 1, S5 Table).  
 147 In terms of paternal Y-chromosomal lineages, we assigned LUN004 to R1b-L52 (Table 1, S6 Table), but  
 148 without additional resolution to determine whether this sample carries the R1b-P312/S116  
 149 haplogroup introduced to Britain by Bell Beaker peoples during the Chalcolithic, alongside Yamnaya-

150 related ancestry (7). During the Chalcolithic, R1b-derived haplogroups largely replaced the  
151 predominant I2a Y-chromosome lineage in the British Neolithic (7,8,39) except in Orkney where I2a  
152 persisted into the Bronze Age (13). R1b sub-clades are extremely common across Britain and western  
153 Europe from the Iron Age onwards (13,14,17,40).

## 154 **Allele frequency-based genomic affinities in ancient Britain**

155 To investigate population affinities of the individuals from Pictland, we performed Principal  
156 Component Analysis (PCA) and ADMIXTURE analyses on a dataset comprising present-day Europeans,  
157 the newly imputed genomes and the imputed ancient genomes from Margaryan et al. (9) (S7 Table).  
158 The PCA shows that the ancient individuals from Britain broadly fit within present-day diversity (Fig  
159 2A). However, we notice some variability among these individuals as BAL003 and LUN004 fall within  
160 the modern Welsh cluster, but with BAL003 being notably closer to the present-day Scottish,  
161 Orcadians, English and Northern Irish clusters, suggesting some degree of genetic differentiation  
162 amongst individuals from Pictland. The Iron Age and Roman period individuals from England are  
163 spread across the modern English, Northern Irish, Scottish and Welsh clusters. Four ancient Orcadians  
164 from the Iron and Viking Ages fit with present-day Welsh, Northern Irish and Scottish populations.  
165 However, two Viking Age Orcadians (VK204 and VK205) are intermediates between the British and  
166 Scandinavian clusters, consistent with previous results finding evidence of admixture in these  
167 individuals between British-like and Scandinavian-like ancestries (9). The early medieval individuals  
168 from England are intermediate between modern English people and Scandinavians, which is  
169 consistent with various degrees of admixture between Iron Age groups from England and immigrants  
170 from northern/central Europe (14,17). These results agree with the pseudo-haploid-based analyses of  
171 the BAL003 and LUN004 genomes, showing a broad affinity to modern western Europeans (S1.3 Text,  
172 S10, S12-S15 and S18 Figs), but with a much-improved resolution.

173



174 **Fig 2. Genetic diversity of Iron Age, early medieval and present-day individuals from northern and**  
175 **central Europe. A)** A Principal Component Analysis of 4,914 individuals and 87,518 SNPs. **B)** An  
176 ADMIXTURE ancestry component (K=4) of these same genomes (see S7 Fig for the complete analysis  
177 from K=2 to K=10).

## 178 **Haplotype-inferred genetic structure in early medieval Britain**

179 Haplotype-based methods have been shown to outperform conventional unlinked SNP approaches in  
180 the detection of population substructure (41). To make use of the additional power provided by  
181 linkage disequilibrium, we conducted a FineSTRUCTURE clustering analysis and Identity-By-Descent  
182 (IBD) analysis on the imputed diploid dataset. Our analysis show that the genomes from Lundin Links  
183 and Balintore form a genetic cluster together with genomes from the Iron Age and Roman period from  
184 England (except 6DT3 - who instead show strong affinity to western/central Europe or Scandinavia  
185 based on the IBD analysis, Fig 3, S1.6 Text - and I0160), and from the Late Iron Age to Viking Age from  
186 Orkney (except VK204 and VK205 who carried substantial Scandinavian-like ancestry; 'Pop12', S25  
187 Fig, Fig 3). Included in this cluster are also Viking Age individuals from Britain, Iceland and Scandinavia;  
188 the latter likely corresponds to individuals buried in Scandinavia but whose parents were from a  
189 British-like gene pool, consistent with results in Margaryan et al. (9). Based on *outgroup-f3*, the  
190 individuals from Orkney, Scotland, and England, dated from the Iron Age to medieval period are  
191 symmetrically related to each other (S5 Fig). However, we also note that BAL003, but not LUN004,  
192 show multiple instances of IBD sharing >4 cM with early medieval individuals from England (S21 Fig),  
193 which is also reflected in their relative position in the PCA (Fig 2A), implying substantial shared  
194 ancestry and possibly recent gene-flow from a source genetically similar to those samples. This implies  
195 that we cannot consider individuals from Pictland a homogenous genetic group but instead a complex  
196 mixture of contemporary genetic ancestries.

197 The unlinked approach implemented in the ADMIXTURE analysis also reveals a minor but detectable  
198 genetic structure consistent with results from the PCA (Fig 2A) but not evident in the FineSTRUCTURE

199 analysis (Fig 2B, S7 Fig). While the proportion of ancestry components are similar across BAL003,  
200 LUN004, Iron Age and Roman period in England, the Late Iron Age and unadmixed Viking Age  
201 Orcadians are differentiated from this group (Fig 2B, S7 Fig). They show an absence of the grey and  
202 green ancestry components, likely first introduced by Scandinavian migrants as they are first observed  
203 in VK204 and VK205 and then in modern Orcadians. These components are also carried at a high  
204 proportion in modern Norwegians and Danes. However, due to allele frequency bias between the two  
205 imputed datasets, likely skewing allele frequency-based analyses (S1.4 Text, S8 and S9 Figs), we  
206 refrained from calculating D-statistics to investigate this signal further. Nevertheless, a high relative  
207 count of IBD sharing (>1 cM, >4 cM and >6cM) between LUN004 and Late Iron Age or Viking Age  
208 Orcadians (S21 Fig) demonstrates that gene flow between Orkney and mainland Scotland likely  
209 occurred.

210 The Iron Age and unadmixed Viking Age Orcadians also show the highest degree of a red ancestry  
211 component (Fig 2B, S7 Fig), which is inconsistent with having originated from direct gene flow from  
212 any population included in this study and instead likely reflects retention of a less diverse pre-Iron Age  
213 ancestry in Orkney and/or strong genetic drift (such as a bottleneck or founder effect). In fact, recent  
214 research show that Bronze Age populations in Orkney were differentiated from their counterparts on  
215 mainland Britain due to retention of male Neolithic ancestry (Y-chromosomal haplogroup I2), while  
216 the R1b haplogroup associated with Bell Beaker expansion largely replaced the I2 haplogroups in the  
217 rest of Britain (13), implying that local ancestry may have persisted also into the Iron Age and early  
218 medieval period. Moreover, although modern Orcadians are differentiated from the rest of the British  
219 Isles due to extensive admixture with Scandinavians, recent genomic research shows that genetic drift  
220 also played an important role (11,42). This is consistent with our results that show a high proportion  
221 of shared IBD segments among modern Orcadians (>1 to >6 cM, S19 Fig), meaning they share a high  
222 proportion of recent common ancestors relative to most modern European populations, typical of  
223 small or genetically isolated populations. Three Orcadians dated from the Late Iron Age and Viking  
224 Age also displayed the highest number of small HBD <1.5 cM (S24 Fig), typical of individuals

225 descending from a small population. One ancient individual from Orkney (VK201) evidenced a long  
226 Homozygosity-By-Descent (HBD) segment (>9.5 cM), the longest observed amongst all ancient  
227 individuals and indicative of small population size or inbreeding (S24 Fig). Overall, these data indicate  
228 a long-term small population size, which likely contributed to the extensive genetic drift observed in  
229 modern Orcadians. The genetic differentiation between populations living in Orkney and Scotland  
230 during the Late Iron Age and early medieval period could thus be partially explained by different  
231 degrees of genetic drift.

### 232 **Analysis of genetic continuity across Britain**

233 The Pictish data allow us to obtain a transect of Iron Age/early medieval genomes across Britain and  
234 directly look at the pattern of haplotype sharing between them and present-day genomes. The Iron  
235 Age and Roman period (except 6DT3) individuals from England and Scotland share more IBD segments  
236 >1 cM (both in terms of number and length) with present-day individuals from Scotland (including  
237 Orkney), Northern Ireland and Wales than with any other European populations included in our  
238 analyses (Fig 3, S20 Fig), consistent with the structure observed in the PCA analysis (Fig 2A). We also  
239 show that all early medieval individuals (excluding I0777) share more IBD with modern Danish than  
240 with any other present-day population (Fig 3), suggesting genetic continuity between modern-day  
241 Danish and the ancestors of these individuals (S1.6 Text).

242 The analysis also revealed high IBD sharing between early medieval individuals from England and  
243 present-day people across Britain following a southeast/northwest cline (Fig 4 and S22 Fig). This  
244 pattern suggests that Anglo-Saxon ancestry expanded out of south-eastern England followed by  
245 admixture with local populations, which is a scenario consistent with previous research  
246 (11,14,17,42,43). BAL003 and LUN004 share a high proportion of IBD segments with present-day  
247 people from western Scotland, Wales and Northern Ireland, similar to the individuals from Late Iron  
248 Age Orkney and England (Fig 4 and S22 Fig). However, unlike these individuals, LUN004, and to a lesser  
249 extent BAL003, shares relatively few IBD segments with the present-day eastern Scottish population

250 sample (Fig 4 and S22 Fig). Byrne et al. (43) and Gilbert et al. (42) previously suggested that the genetic  
251 structure between western and eastern Scotland could result from the divide between the kingdoms  
252 of the Gaelic-speaking Dál Riata in the west and Picts in the east, which is seemingly in contradiction  
253 with the results presented here. Instead, the present-day genetic structure in Scotland likely results  
254 from more complex demographic processes that cannot be reduced to a single model.

255 We propose two non-exclusive processes that might explain the observed pattern of IBD sharing  
256 between the Iron Age and early medieval populations and the present-day Scottish population. The  
257 first is substantial admixture from immigrants that brought Iron Age Orcadian-, and England-like  
258 ancestries (likely independently), which partially replaced the eastern Scottish early medieval gene  
259 pool. Indeed, in the following centuries (AD 1,100-1,300), eastern Scotland received substantial  
260 immigration, such as settlers from Britain south of the Forth, France, and the Low Countries (44–46).  
261 Under this scenario, BAL003 and LUN004 are good representatives of the broader ancestry present in  
262 Scotland during the Pictish period. Alternatively, the ancestors of BAL003 and LUN004 share more IBD  
263 segments with present-day people from western Scotland, Wales, and Northern Ireland because they  
264 (or their direct ancestors) migrated from these regions but did not contribute substantially to later  
265 generations via admixture with local groups in eastern Scotland. This scenario is consistent with an  
266 emerging picture of west-east lifetime mobility of both males and females in the early medieval period  
267 in Scotland (47,48). Under such a model, it may be feasible that there are indeed still undiscovered  
268 ‘pockets’ of eastern Pictish-period ancestry, likely similar to that observed in Iron Age Orcadians, that  
269 was differentiated from ancestry carried by BAL003 and LUN004 and which contributed significantly  
270 to present-day populations from eastern Scotland. Oxygen and strontium isotope analysis of teeth  
271 from these individuals holds promise to characterise this further. Importantly, we also emphasise that  
272 stochasticity likely affected the pattern of IBD sharing in such a small sample size. Indeed, high  
273 variability in IBD sharing is observed amongst individuals from the early medieval and Iron Age groups,  
274 and to some extent between BAL003 and LUN004 (S22 Fig).

275

276 **Fig 3. Shared Identity-By-Descent (IBD) segments >1 cM between the ancient genomes from Britain**  
277 **and present-day European populations. IA, Iron Age. VA, Viking Age.**

278

279 **Fig 4. Average IBD sharing >1 cM between present-day and ancient groups from the UK.** IBD sharing  
280 between each of the ancient genomes and modern samples is illustrated in S22 Fig. Ancient individuals  
281 are indicated with coloured symbols. The black dots represent the geographic location of present-day  
282 people from 35 regions of the UK (11,49), by the county town.

283

284 Our results also show substantial IBD sharing between Iron Age, Viking Age and present-day  
285 Orcadians, supporting our observations using allele-frequency based methods of strong genetic  
286 continuity in this region over time (Fig 2, 4 and S22 Fig). Therefore, the marked genetic differentiation  
287 between the Orkney and mainland Britain is not only a result of Scandinavian admixture, as previously  
288 hypothesised (11,42,50–53) but also pronounced genetic continuity that persisted for at least 2,000  
289 years. The relatively low IBD sharing between BAL003 and LUN004 and modern-day Orcadians (Fig 4)  
290 suggest the emergence of Pictish culture in Orkney (21,22,36) was not associated with population  
291 replacement but largely due to cultural diffusion and connections.

292 IBD segments in Iron Age individuals from south-eastern England are widespread throughout western  
293 and northern Britain compared to the more recent Romano-British individuals from northern England;  
294 the latter, however, do not share substantial IBD with any present-day people of the British Isles (Fig  
295 4 and S22 Fig). The only exceptions is 6DT3 who was from the same genetic population as two early  
296 medieval individuals (I0159 and I0773) with Scandinavian-, and northern European-like ancestry  
297 ('pop12', S22 Fig, S1.6 Text). 6DT3 also share relatively more IBD segments >1 cM with the present-

298 day population from Scandinavia, Belgium and the UK (Fig 3), suggesting that Scandinavian-like  
299 ancestry could have spread to the British Isles before the Anglo-Saxon period.

## 300 **Social organisation**

301 Seven mtDNA genomes were retrieved at Lundin Links, which allows us to answer questions about the  
302 Pictish social organisation reflected in the individuals interred at the site. The use of the cemetery was  
303 relatively short, likely around 130 years (S2 Fig), and the individuals excavated were adults (S1 Table)  
304 (35). The diversity of mtDNA lineages was high, and none of the individuals shared an immediate  
305 maternal ancestor (S5 Table). It is worth noting that the two individuals retrieved from the horned  
306 cairns complex individuals (S1 Fig) show evidence of familial links based on skeletal morphology  
307 (LUN001 and LUN009) (35), but are not maternally related (S5 Table). In a matrilineal system, which is  
308 typical of matrilineal descent, low female post-marital migration and high male migration decrease  
309 female mtDNA diversity (54–57). This result suggests the individuals buried at Lundin Links were  
310 unlikely to have been practicing matrilocality. Ongoing isotope analyses focused on the movement  
311 histories of the Lundin Links individuals using strontium, oxygen and other isotope approaches may  
312 further characterise sex-specific mobility. Additional Y-chromosome analyses will also help confirm  
313 whether patrilocality or neolocality was more common in Pictish society (54).

314 Seventy per-cent of matrilineal societies are associated with a matrilineal system (58). Thus, this is  
315 unlikely that the community at Lundin Links followed a matrilineal inheritance system, which  
316 challenges older arguments for matrilineal succession among Pictish rulers (59). However, while some  
317 individuals buried at Lundin Links may have been of elevated social status, the relationship between  
318 people buried in monuments such as these and the Pictish uppermost elite is uncertain. The cemetery  
319 evidences a wide diversity of cultural practices (35), mirrored in the high mitochondrial diversity,  
320 suggesting relatively high levels of mobility within the Pictish social structure at this level of society.  
321 The burials are organised in complex and stand-alone graves, made of round and square cairns and  
322 long cists (S1 Fig). This complexity suggests that, as social practices influence the genetic structure of

323 populations, the social status of archaeological sites can, in turn, bias our understanding of population  
324 structure; in this case, the samples may only be representative of a small proportion of the overall  
325 Pictish population. Non-harmonious kinship systems (i.e., patrilocal and patrilineal or matrilocal and  
326 matrilineal societies) may also impact the genome in different ways. The lack of broad sample size and  
327 useful markers (Y-chromosome) to enhance kinship- and mtDNA-based findings remains an obstacle  
328 to illuminate further Pictish descent patterns.

## 329 **Conclusions**

330 Our study provides novel insight into genetic affinity between ancient and modern populations of the  
331 British Isles, a rare opportunity to directly observe micro-scale evolution. High-quality genomes of two  
332 individuals buried in Scotland from the Pictish period, one from Balintore (BAL003) and one from  
333 Lundin Links (LUN004), reveal a close genetic affinity to Iron Age populations from Britain but with  
334 evidence of some genetic differentiation between samples. Overall, our data supports the current  
335 archaeological consensus arguing for regional continuity between the Late Iron Age and early  
336 medieval periods, but likely with complex patterns of migration, life-time mobility and admixture. We  
337 also show that BAL003 and LUN004 were genetically differentiated from the pre-Viking Age Picts from  
338 Orkney, which suggests that Pictish culture spread to Orkney from Scotland primarily via cultural  
339 diffusion rather than direct population movement or inter-marriage. We detect strong continuity  
340 between local Iron Age and present-day peoples in Orkney but less pronounced affinity between early  
341 medieval and modern people in eastern Scotland. More ancient genomes from the Iron Age and early  
342 medieval periods in the UK are necessary to illuminate these relationships further, combined with  
343 analyses of lifetime mobility using complementary approaches (e.g., isotope analysis). On a more local  
344 level, our mtDNA analysis of individuals interred at Lundin Links is inconsistent with matrilocality. This  
345 finding argues against the older hypothesis that Pictish succession was based on a matrilineal system,  
346 assuming that wider Pictish society was organised in such manner.

## 347 **Materials and Methods**

### 348 **DNA extraction, library preparation and sequencing**

349 All aDNA work was carried out in dedicated facilities at Stockholm University. The samples were  
350 decontaminated by removing the outer surfaces via abrasion using a Dremel drill after a thorough  
351 cleaning in 1% sodium hypochlorite, followed by wiping with molecular biology-grade water and  
352 ethanol, and UV irradiation at 254 nm in a crosslinker (Ultra-Violet Products Ltd., Cambridge, UK) for  
353 10 min each side at a distance <10cm. Approximately 100-200mg of bone or tooth (dentine) powder  
354 was extracted from each specimen using a Dremel drill at the lowest possible rotation-per-minute  
355 (5000 rpm).

356 DNA was extracted using 1mL extraction buffer consisting of 0.45mL EDTA (pH8), 1M urea, and 10uL  
357 of 10mg/ml proteinase K. The mixture was incubated overnight (~18 hrs) at 37°C and purified on  
358 Qiagen MinElute columns following the manufacturer's recommendation, but with an additional wash  
359 step. DNA was eluted in a 63uL Qiagen Elution buffer. Illumina-compatible sequencing libraries were  
360 constructed following Meyer and Kircher (2010) (60) as outlined in Rodríguez-Varela et al. (2017) (61)  
361 and sequenced on an Illumina HiSeq2000 platform. BAL003 and LUN004 libraries were generated  
362 using enzymatic damage repair (34), from the same extracts as BAL003-b1e1l1 and LUN004-b1e1l1,  
363 respectively, and sequenced over 5 lanes for LUN004 and 6 lanes for BAL003.

### 364 **Sequence processing and alignment**

365 We discarded reads with indexes showing at least one mismatch. Read pairs were merged and adapter  
366 sequence removed using Adapter Removal v2.1.7 (62), with a minimum overlap of 11 bp and summing  
367 base qualities in overlapping regions. Merged read pairs were mapped as single-end reads to the  
368 human reference genome build 37 with decoy sequences (hs37d5) using BWA aln v0.7.8 (63) with the  
369 non-default parameters -n 0.01 (maximum edit distance) and -o 2 (maximum number of gap opens),



370 allowing more mismatches and indels, and disabled seeding with -l 16500 as in Lazaridis et al. (2014)  
371 (1) and Skoglund et al. (2014) (64). We collapsed duplicate reads having identical start and end  
372 coordinates into consensus reads using FilterUniqueSAMCons.py (65). Finally, we filtered the  
373 alignment so that only reads longer than 35 bp, with mapping quality >30, not containing indels, and  
374 with more than 90% matches with the reference were retained. We merged libraries sequenced over  
375 several lanes using SAMTOOLS v1.9 (63). Summary statistics of the obtained reads are presented in S1  
376 Table.

### 377 **Identification of authentic aDNA molecules and contaminant DNA**

378 We used MapDamage v2.0 (66) to visualise the substitution distribution along the reads and  
379 evidence the presence of damaged aDNA molecules. Contamination was estimated using three  
380 different data sources, namely: 1) the mitochondrial genome, 2) X-chromosome contamination in  
381 males, and 3) Y-chromosome contamination in females. We estimated present-day mtDNA-based  
382 contamination using Schmutzi (67). For males we used ANGSD (68), which utilises heterozygous calls  
383 on the X-chromosome of male samples, expected to be haploid, to estimate contamination. For  
384 females, Y-chromosome contamination was assessed by comparing the observed number of reads  
385 mapped on the non-pseudo-autosomal region of the Y-chromosome with the expected number if  
386 the sample was male. The expected number of Y-chromosome reads is approximated as half the  
387 number of reads mapping to the autosomes multiplied by the Y-chromosome fraction of the  
388 genome; this assumes the alignment efficiency for the Y-chromosome and autosomes are similar.  
389 The Y-chromosome makes up 2% of the genome (69).

### 390 **Sex determination**

391 The biological sex of sequenced individuals was determined using the  $R_y$  parameters (70).  $R_y$  is the  
392 fraction of the Y-chromosome alignments ( $n_y$ ) compared to the total number of reads aligned to the  
393 X- and Y-chromosomes ( $n_x + n_y$ ). The 95% confidence interval (CI) was computed as  $R_y \pm$

394  $\frac{1.96 \times R_y \times (1 - R_y)}{(n_y + n_x)}$ . This method determines whether an ancient individual can be determined to be male  
395 or female. If the lower CI limit of  $R_y$  is  $>0.077$  the individual is assigned as male. If the upper CI limit  
396 of  $R_y$  is  $<0.016$  the individual is assigned as female.

## 397 **Mitochondrial and Y-chromosome haplogroups**

398 We obtained the consensus mitochondrial DNA from endogenous reads, removing the bases with  
399 quality  $<30$  ( $-q\ 30$ ) using Schmutzi (67). The mitochondrial haplogroups were assigned using  
400 Haplogrep2 (71). The Y-chromosome haplogroup was obtained using pathPhynder (72), based on  
401 approximately 120,000 SNPs present in a dataset of Y-chromosomal variation in worldwide present-  
402 day and ancient males and the International Society Of Genetic Genealogy (ISOGG,  
403 <http://www.isogg.org>).

## 404 **Genomic analysis of pseudo-haploid sequences**

405 The pseudo-haploid genomes of BAL003 and LUN004 were analysed with a set of published pseudo-  
406 haploid ancient genomes, the Human Origins dataset and the Simon Genome Diversity Project from  
407 the Allen Ancient DNA Resource (<https://reich.hms.harvard.edu/>) using PCA (73), ADMIXTURE  
408 analysis (74),  $D$ - and  $f$ -statistics (73,75) and  $qpAdm$  (4) (S1.3 Text).

## 409 **Imputation**

410 Genomes of 33 individuals with a coverage  $>0.7\times$  from nine geographic regions were imputed using  
411 GLIMPSE (76), namely: 1) two early medieval individuals from Scotland dated from the Pictish period  
412 (BAL003 and LUN004, this study); 2) three Iron Age (I0789, I0156 and I0160) (17), four Roman British  
413 (6DT3, 6DT18, 6DT21 and 6DT22) (14) and eight early medieval individuals from England (I0769, I0773,  
414 I0774, I0777, I0157, I0159, I0161 and NO3423) (14,17); 3) one Iron Age individual from Norway, 4) six  
415 Iron Age individuals from Sweden; 5) three early medieval individuals from Hungary (SZ15, SZ43 and  
416 SZ45) (15); 6) two early medieval individuals from Germany (Alh1 and Alh10) (16); 7) one Iron

417 Age/early medieval individual from Slovakia (DA119) (77); 8) one early medieval individual from the  
418 Czech Republic (RISE569) (3); 9) two pre-Christian individuals from Iceland (SBT-A1 and DAV-A8) (78)  
419 (S1.4 Text, S7 Table).

## 420 **Genotype phasing**

421 The EU and UK datasets were phased together with the genomes from Margaryan et al. (9) (S7 Table,  
422 S1.5 Text) and the re-imputed and newly imputed ancient genomes using BEAGLE 5.2 (79). We  
423 restricted the phasing on the intersections of the genotypes newly imputed in this study and those  
424 imputed in Margaryan et al. (9) to prevent sporadic missing genotypes imputation by BEAGLE 5.2 (79).  
425 The window and overlap lengths were set as wider than any chromosome (window length 380 cM and  
426 overlap length 190 cM) to maximise the information used for phasing the genomes. The 1000  
427 genomes phase 3 dataset  
428 ([http://bochet.gcc.biostat.washington.edu/beagle/1000\\_Genomes\\_phase3\\_v5a](http://bochet.gcc.biostat.washington.edu/beagle/1000_Genomes_phase3_v5a)) and GRCh37  
429 genomic maps ([http://bochet.gcc.biostat.washington.edu/beagle/genetic\\_maps/](http://bochet.gcc.biostat.washington.edu/beagle/genetic_maps/)) provided by  
430 BEAGLE were used for phasing. Imputation and genotyping errors can increase phasing errors.  
431 However, the BEAGLE phasing algorithm (Hidden Markov Model-based haplotype clustering)  
432 improves widely as the sample size increases. The improvement due to the sample size minimises the  
433 phasing error from possible genotyping and imputation biases.

## 434 **Reference panel**

435 We compiled four datasets (S1.5 Text), 1) a set of 1,764 modern individuals from 18 worldwide  
436 populations from the 1000 genomes project phase 3 (80), 2) a set of 10,299 modern European  
437 individuals from the EGAD00000000120 International Multiple Sclerosis Genetics Consortium & The  
438 Wellcome Trust Case Control Consortium 2 dataset (81), 3) a set of 2,578 modern British individuals  
439 from the EGAD00010000632 People of the British Isles dataset (11,49) and 4) a set of 252 ancient  
440 European genomes dated from around the Viking Age period (9).

## 441 **Principal Component Analysis**

442 A PCA was generated using the re-imputed and newly imputed ancient genomes, the ancient genomes  
443 from Margaryan et al., (2020) (9) and the modern EU and UK dataset using PLINK v1.9 (82,83). SNPs  
444 with minor allele frequency (maf) <5% and in linkage disequilibrium (--indep-pairwise 100 10 0.2) were  
445 excluded with PLINK v1.9 (82,83). The PCA was generated on 8,389 individuals and 88,040 SNPs.

446 A second PCA was generated to increase variability around the ancient British genomes. It was  
447 restricted to the modern individuals from Belgium, Denmark, Germany, Norway and the UK, the  
448 ancient genomes from the Iron Age and Viking Age individuals from Orkney and re-imputed and the  
449 newly imputed ancient genomes in this study from the British Isles, Iceland, Scandinavia, Germany,  
450 Slovakia and the Czech Republic following the same method as above. The PCA was generated on  
451 4,914 individuals and 87,518 SNPs.

## 452 **ADMIXTURE**

453 Ancestry components were estimated in modern individuals from Belgium, Denmark, Germany,  
454 Norway, and ancient genomes from the Iron Age and Viking Age individuals from Orkney and the  
455 newly imputed ancient genomes from the British Isles, Scandinavia, Germany, Slovakia and Czech  
456 Republic using the program ADMIXTURE v1.2 (74). Sites with maf <5% and SNPs in linkage  
457 disequilibrium (--indep-pairwise 100 10 0.2) were removed with PLINK v1.9 (82,83), leaving 4,912  
458 individuals and 75,295 SNPs. ADMIXTURE was run with cross-validation (CV) enabled using -cv flag  
459 and 50 bootstraps from K=2 to K=10.

## 460 ***D-* and *F-statistics***

461 Individual or population relatedness was performed using *outgroup-f3* statistics with the qp3Pop  
462 function from ADMIXTOOLS 2 R package (<https://github.com/uqrmaie1/admixtools>). *F3-statistics*  
463 *f3(Yoruba; A, B)* measure allele frequency correlation between populations. When X is an equidistant

464 outgroup to A and B, *outgroup-f3* becomes a genetic drift measure between A and B. The outgroup  
465 Yoruba is expected to be equidistant from all tested samples.

466 To obtain information on individuals or population admixture, we performed outgroup *D-statistics* of  
467 the form  $D(A, B; C, \text{Yoruba})$  using the `qpDstats` function from ADMIXTOOLS 2 R package  
468 (<https://github.com/uqrmaie1/admixtools>). A, B and C are either present-day or ancient  
469 populations/individuals. A result equal to 0 means that the proposed tree  $((A, B), C), \text{Yoruba}$  is  
470 consistent with the data. If D deviates from 0, there are more alleles shared than expected given the  
471 proposed tree either between A and C ( $D > 0$ ) or between B and C ( $D < 0$ ).

## 472 **Identity-By-Descent and Homozygosity-By-Descent**

473 The identification of IBD and HBD segments was done using RefinedIBD (84). The window size was set  
474 to 3 cM. The minimal size for a segment to be considered shared by IBD or HBD is 1 cM. We decided  
475 to consider segments  $>1$  cM as shared by IBD since 1 cM corresponds to the timespan between the  
476 oldest samples from the Iron Age and present-day populations. A common ancestor  $n$  generations in  
477 the past ( $2n$  meiosis) results on average in  $100/2n$  cM segment length (85). Thus, IBD segments longer  
478 than 1 cM derive from common ancestors living  $\sim 50$  generations in the past, or  $\sim 1,500$  years ago; this  
479 assumes an average human generation time of 30 years (86), which is the period roughly including  
480 samples from the Iron Age until the present. The total number and total length of shared IBD segments  
481 were generated. To avoid sample size bias, we randomly selected the same number of modern  
482 individuals across populations using 100 bootstraps (S1.6 Text).

483 Additionally, we generated interpolated frequency maps of the total number of shared IBD between  
484 modern populations and ancient individuals/populations from the UK with QGIS v3.14.1 (87) using  
485 distance coefficient  $P = 2$  and pixel size = 0.01. We used the county town as a proxy for the county  
486 geographic coordinate.

## 487 **Chromopainter and FineSTRUCTURE**

488 ChromoPainter is a tool for finding the closest haplotypes in sequence data where each individual is  
489 painted as a combination of all other genomes using the Li-Stephen Model (88). ChromoPainter paints  
490 the genome of each 'recipient' using all the remaining individuals as 'donors'. We used ChromoPainter  
491 v2.9.0 (41) to paint all of the ancient individuals (n=284). We realised the PCAs based on the  
492 ChromoPainter co-ancestry matrix using FineSTRUCTURE GUI.  
493 FineSTRUCTURE v2.9.0 (41) was then used to perform population assignment based on the  
494 ChromoPainter coancestry matrix. In brief, FineSTRUCTURE is similar in concept to ADMIXTURE but  
495 accesses a large number of SNPs and linkage disequilibrium (haplotype) information. FineSTRUCTURE  
496 uses an MCMC approach to partition the dataset into K groups with indistinguishable genetic ancestry,  
497 interpreted as individual populations. The program was run using 100,000 iterations and 100,000  
498 burn-in.

499

## 500 **Supporting Information**

501 **S1 Table. DNA sample information from eight Pictish genomes in this study.**

502 **S2 Table. Cross-contamination rate in LUN001 and LUN003 mtDNA reads.**

503 **S3 Table. Contamination estimates in LUN001 and LUN003 based on f4-ratio.**

504 **S4 Table. Calibrated <sup>14</sup>C radiocarbon dates.**

505 **S5 Table. Mitochondrial DNA mutations and haplogroup attribution.**

506 **S6 Table. Y-chromosome mutations on LUN004.**

507 **S7 Table. Comparison datasets for the analysis of the pseudo-haploid genomes and imputed**  
508 **genomes from Margaryan et al. (9).**

- 509 **S8 Table. Shared genetic drift between the BAL003, LUN004 and modern populations as**  
510 ***f3(BAL003/LUN004, modern;Mbuti)*.**
- 511 **S9 Table. *D*(Iron Age/Roman English, Iron Age/Medieval European; BAL003/LUN004, Mbuti).**
- 512 **S10 Table. *D*(Iron Age/Roman English, BAL003/LUN004; modern and ancient populations, Mbuti).**
- 513 **S11 Table. Coancestry matrix obtained with ChromoPainter for the analysis of 284 ancient**  
514 **European genomes dated from the Iron Age to medieval period.**
- 515 **S12 Table. Genotypes associated with lactase persistence and skin, eyes and hair pigmentation**  
516 **with subsequent prediction performance metrics from HirisPlex-S.**
- 517 **S1 Fig. Plan of cists at Lundin Links.** The plan was published in Greig et al. (35). The samples yielding  
518 DNA are in red.
- 519 **S2 Fig. Calibrated <sup>14</sup>C radiocarbon dates.**
- 520 **S3 Fig. Deamination pattern along the reads.**
- 521 **S4 Fig. Biological sex.** We determined the biological sex based on Y-chromosome alignments ( $n_y$ )  
522 compared to the total number of reads of the X and Y-chromosomes ( $n_x + n_y$ ). The 95% confidence  
523 interval (CI) was computed as  $R_y \pm \frac{1.96 \times R_y \times (1 - R_y)}{(n_y + n_x)}$ .
- 524 **S5 Fig. Genetic distance between BAL003, LUN004, Iron Age and Roman individuals from England**  
525 **and Iron and Viking Age individuals from Orkney (excluding VK204 and VK205) measured using**  
526 ***outgroup-f3 statistics*.**
- 527 **S6 Fig. Cross-validation error of the ADMIXTURE analyses.** The cross-validation was done using the -  
528 -cv option of admixture runs for K=1 to K=10 with 4,914 individuals and 87,518 SNPs using 50  
529 bootstraps (-B 50).

530 **S7 Fig. ADMIXTURE Model-based clustering analysis of 4,914 modern and ancient Northern and**  
531 **Central Europeans from the Iron Age, Early Medieval period and present-day (K=2 to K=10).**

532 **S8 Fig. Principal Component Analysis of the 8,389 present-day and ancient individuals from this**  
533 **study.** SNPs with maf <5% were removed and pruned (88,040 SNPs remained). PC3 is impacted by  
534 allele frequency bias differentiating the data imputed in Margaryan et al. (9) and the genomes newly  
535 imputed in this study.

536 **S9 Fig. Correlation between coverage and PC3 coordinates from the PCA presented in S8 Fig.** The  
537 genomes newly imputed in this study are in blue and the genomes imputed in Margaryan et al. (9)  
538 are in pink.

539 **S10 Fig. Genetic affinity of BAL003 and LUN004 compared to western Eurasians using PCA.** Pseudo-  
540 haploid genotypes from ancient samples are projected onto the first two principal components  
541 defined by 1,056 present-day West Eurasians from the 'HO' dataset (S7 Table). VA, Viking Age.

542 **S11 Fig. Cross-validation error of the ADMIXTURE analysis.** The cross-validation was done using the  
543 --cv option of admixture runs for K=3 to K=20 with 3,591 individuals and 85,655 markers.

544 **S12 Fig. ADMIXTURE ancestry component (K = 15) of ancient shotgun and present-day worldwide**  
545 **individuals.** Full displays of the ADMIXTURE analysis are in S13-S15 Figs.

546 **S13 Fig. Model-based clustering analysis of 3,594 individuals (K=3 to K=20).** Only modern  
547 individuals are represented.

548 **S14 Fig. Model-based clustering analysis of 3,594 individuals (K=3 to K=20).** Only ancient individuals  
549 from western Eurasia are represented.

550 **S15 Fig. Model-based clustering analysis of 3,594 individuals (K=3 to K=20).** Only ancient individuals  
551 from Eastern Eurasia are represented.



552 **S16 Fig. Testing for symmetry between the pseudo-haploid BAL003 and LUN004 genomes and the**  
553 **Iron Age or Roman period individuals from England relative to other ancient and modern**  
554 **populations.** We tested for symmetry as  $D(\text{Pict}, \text{ancient England}; X, \text{Mbuti})$  and plotted the resulting  
555 Z-scores. Details on the test results and sample size are in S10 Table.

556 **S17 Fig. Testing for continuity between European Iron Age/medieval period and BAL003 and**  
557 **LUN004 pseudo-haploid genomes using qpAdm in a one-way admixture model.**

558 **S18 Fig. Modelling Bronze Age, Iron Age and Middle Age European populations as a mixture of**  
559 **Western Hunters-Gatherers (WHG), Anatolian Neolithic (Anatolia\_N) and Bronze Age Yamnaya**  
560 **using qpAdm on pseudo-haploid genomes.** Empty bars are target populations for which the three-  
561 way models' proportion was impossible to estimate using qpAdm. Vik\_97002.SG, vik\_97026.SG,  
562 vik\_urm045.SG and vik\_urm161.SG are individuals buried in a Viking context in Sigtuna, Sweden but  
563 likely migrants of diverse origins. G, generation.

564 **S19 Fig. Shared Identity-By-Descent (IBD) segments between and within present-day European**  
565 **populations.** A) Total length of shared IBD segments >1 cM, B) total number of shared IBD segments  
566 >1 cM, C) total number of shared IBD segments >4 cM and D) total number of shared IBD segments  
567 >6 cM. The number corresponds to the mean of 100 bootstraps drawing 44 random individuals per  
568 population.

569 **S20 Fig. Shared Identity-By-Descent (IBD) segments between ancient genomes and modern**  
570 **European populations.** The ancient genomes are the newly imputed genomes and the six ancient  
571 Orcadians from Margaryan et al. (9). A) Total length of shared IBD segments >1 cM, B) total number  
572 of shared IBD segments >1 cM, C) total number of shared IBD segments >4 cM and D) total number  
573 of shared IBD segments >6 cM. The number corresponds to the mean of 100 bootstraps drawing 44  
574 random individuals per European population.

575 **S21 Fig. Shared Identity-By-Descent (IBD) segments between ancient individuals from Britain.** A)

576 Total length of shared IBD segments >1 cM, B) total number of shared IBD segments >1 cM, C) total

577 number of shared IBD segments >4 cM and D) total number of shared IBD segments >6 cM. IA, Iron

578 Age; VA, Viking Age; Emedieval, early medieval.

579 **S22 Fig. Number of Identity-By-Descent (IBD) segments shared between present-day British and**

580 **the ancient genomes from Britain.**

581 **S23 Fig. Distribution of Identity-By-Descent (IBD) length as a function of the time difference**

582 **between pairs of samples.**

583 **S24 Fig. Distribution of Homozygosity-By-Descent (HBD) across ancient individuals from Britain.**

584 **S25 Fig. PCA based on ChromoPainter coancestry matrix and FineSTRUCTURE clustering generated**

585 **for 284 ancient European genomes dated to the Iron Age and medieval period.**

586 **S1 Text. Supplementary information.**

587

## 588 **Acknowledgements**

589 We thank Gareth Weedall at Liverpool John Moores University for his valuable help with editing the

590 manuscript, Jeanette Pearson at Inverness Museum & Art Gallery for facilitating sampling of

591 Balintore material and Jean-Jacques Hublin, Mike Richards (at the time both MPI-EVA), and the Max

592 Planck Society for laboratory access and resources in kind. AM was funded by the Faculty of Science,

593 Liverpool John Moores University. KB was supported by The Leverhulme Trust during production of

594 this manuscript (PLP-2019-284).

595

## 596 **References**

- 597 1. Lazaridis I, Patterson N, Mittnik A, Renaud G, Mallick S, Kirsanow K, et al. Ancient human  
598 genomes suggest three ancestral populations for present-day Europeans. *Nature*.  
599 2014;513(7518):409–13.
- 600 2. Lazaridis I, Nadel D, Rollefson G, Merrett DC, Rohland N, Mallick S, et al. Genomic insights into  
601 the origin of farming in the ancient Near East. *Nature*. 2016;536(7617):419–24.
- 602 3. Allentoft ME, Sikora M, Sjögren KG, Rasmussen S, Rasmussen M, Stenderup J, et al. Population  
603 genomics of Bronze Age Eurasia. *Nature*. 2015;522(7555):167–72.
- 604 4. Haak W, Lazaridis I, Patterson N, Rohland N, Mallick S, Llamas B, et al. Massive migration from  
605 the steppe was a source for Indo-European languages in Europe. *Nature*. 2015;522(7555):207–11.
- 606 5. Mathieson I, Lazaridis I, Rohland N, Mallick S, Patterson N, Roodenberg SA, et al. Genome-  
607 wide patterns of selection in 230 ancient Eurasians. *Nature*. 2015;528(7583):499–503.
- 608 6. Broushaki F, Thomas MG, Link V, López S, Dorp L van, Kirsanow K, et al. Early Neolithic  
609 genomes from the eastern Fertile Crescent. *Science*. 2016;353(6298):499–503.
- 610 7. Olalde I, Brace S, Allentoft ME, Armit I, Kristiansen K, Booth T, et al. The Beaker phenomenon  
611 and the genomic transformation of northwest Europe. *Nature*. 2018;555(7695):190–6.
- 612 8. Brace S, Diekmann Y, Booth TJ, Dorp L van, Faltyskova Z, Rohland N, et al. Ancient genomes  
613 indicate population replacement in Early Neolithic Britain. *Nature Ecology and Evolution*. 2019;3(5).
- 614 9. Margaryan A, Lawson DJ, Sikora M, Racimo F, Rasmussen S, Moltke I, et al. Population  
615 genomics of the Viking world Scandinavian ancestry and Viking Age origins Check for updates. *Nature*.  
616 2020;585(7825):390.

- 617 10. Patterson N, Isakov M, Booth T, Büster L, Fischer CE, Olalde I, et al. Large-scale migration into  
618 Britain during the Middle to Late Bronze Age. *Nature*. 2021;601(7894):1–14.
- 619 11. Leslie S, Winney B, Hellenthal G, Davison D, Boumertit A, Day T, et al. The fine-scale genetic  
620 structure of the British population. *Nature*. 2015;519(7543):309–14.
- 621 12. Armit I, Reich D. The return of the Beaker folk? Rethinking migration and population change  
622 in British prehistory. *Antiquity*. 2021;95(384):1464–77.
- 623 13. Dulas K, Foody MGB, Justeau P, Silva M, Martiniano R, Oteo-García G, et al. Ancient DNA at  
624 the edge of the world: Continental immigration and the persistence of Neolithic male lineages in  
625 Bronze Age Orkney. *Proceedings of the National Academy of Sciences*. 2022;119(8):e2108001119.
- 626 14. Martiniano R, Caffell A, Holst M, Hunter-Mann K, Montgomery J, Müldner G, et al. Genomic  
627 signals of migration and continuity in Britain before the Anglo-Saxons. *Nature Communications*.  
628 2016;7:1–8.
- 629 15. Amorim CEG, Vai S, Posth C, Modi A, Koncz I, Hakenbeck S, et al. Understanding 6th-century  
630 barbarian social organization and migration through paleogenomics. *Nature Communications*.  
631 2018;1–11.
- 632 16. Veeramah KR, Rott A, Groß M, Dorp LV, López S, Kirsanow K, et al. Population genomic analysis  
633 of elongated skulls reveals extensive female-biased immigration in Early Medieval Bavaria.  
634 *Proceedings of the National Academy of Sciences of the United States of America*. 2018;115(13):3494–  
635 9.
- 636 17. Schiffels S, Haak W, Paajanen P, Llamas B, Popescu E, Loe L, et al. Iron Age and Anglo-Saxon  
637 genomes from East England reveal British migration history. *Nature Communications*. 2016;7:1–9.
- 638 18. Thorpe B, editor. *The Anglo-Saxon Chronicle*. Vol. 1. Cambridge: Cambridge University Press;  
639 2012.

- 640 19. Charles-Edwards TM. Wales and the Britons, 350-1064 [Internet]. Oxford: Oxford University  
641 Press; 2012. p. 816. (History of Wales).
- 642 20. Evans N. Picti: from Roman name to internal identity. *Journal of Medieval History*. 2022;1–32.
- 643 21. Wainwright FT. The Problem of the Picts. Wainwright FT, editor. Nelson, 1995; 1955.
- 644 22. Noble G, Gondek M, Campbell E, Cook M. Between prehistory and history: The archaeological  
645 detection of social change among the Picts. *Antiquity*. 2013;87(338):1136–50.
- 646 23. Jackson KH. The Pictish language. In: The problem of the Picts. Frederick T. Wainwright.  
647 Edinburgh: Thomas Nelson; 1955. p. 126–60, 161–6, 173–6.
- 648 24. Kidd C. The ideological Uses of the Picts, 1707-c. 1990. In: *Scottish History: The Power of the*  
649 *Past*. Edward J. Cowan and Richard J. Finlay. Edinburgh: Edinburgh University Press; 2002. p. 169–90.
- 650 25. Forsyth K. Language in Pictland: the case against “non-Indo-European Pictish.” *De Keltiche*  
651 *Draak*; 1997.
- 652 26. Taylor S. Pictish place-names revisited. In: Driscoll ST, Geddes J, Hall MA, editors. Leiden, The  
653 Netherlands: Brill; 2011. p. 67–118.
- 654 27. Rhys G. Approaching the Pictish language: historiography, early evidence and the question of  
655 Pritenic [PhD]. University of Glasgow; 2015.
- 656 28. Isaac GR. Scotland. In: *New Approaches to Place-Names in Ptolemy’s Geography*. J. de Hoz,  
657 E.R. Lújan and P. Sims-Williams. Madrid: Ediciones Clásicas; 2005. p. 189–214.
- 658 29. Rodway S. The Ogham Inscriptions of Scotland and Brittonic Pictish. *Journal of Celtic*  
659 *Linguistics*. 2020;21(1):173–234.
- 660 30. Evans N. Ideology, literacy and matriliney: approaches to medieval texts on the Pictish past. In:  
661 *Pictish progress New studies on Northern Britain in the Early Middle Ages*. Driscoll, S.T., Hall, M. and  
662 Geddes, J. Leiden, The Netherlands: Brill; 2011. p. 45–65.

- 663 31. Woolf A. Pictish matriliney reconsidered. *Innes Review*. 1998;49(2):147–67.
- 664 32. Ross A. Pictish Matriliney. *Northern Studies*. 1999;34:11–22.
- 665 33. Evans N. Royal succession and kingship among the Picts. *Innes Review*. 2008;59(1):1–48.
- 666 34. Briggs AW, Stenzel U, Meyer M, Krause J, Kircher M, Pääbo S. Removal of deaminated  
667 cytosines and detection of in vivo methylation in ancient DNA. *Nucleic Acids Research*. 2010;38(6):e87.
- 668 35. Greig C, Greig M, Ashmore P, Campbell-Wilson M, Lorimer D, Smart I, et al. Excavation of a  
669 cairn cemetery at Lundin Links, Fife, in 1965-6. *Proceedings of the Society of Antiquaries of Scotland*.  
670 2000;130:585–636.
- 671 36. Fraser JE. *From Caledonia to Pictland: Scotland to 795*. Edinburgh University Press; 2009.
- 672 37. Taylor S, Clancy TO, McNiven P, Williamson E. *The Place-Names of Clackmannanshire*.  
673 Donington: Shaun Tyas; 2020.
- 674 38. McNiven P. *Gaelic place-names and the Social History of Gaelic Speakers in Medieval*  
675 *Menteith*. University of Glasgow; 2011.
- 676 39. Sánchez-Quinto F, Malmström H, Fraser M, Girdland-Flink L, Svensson EM, Simões LG, et al.  
677 Megalithic tombs in western and northern Neolithic Europe were linked to a kindred society.  
678 *Proceedings of the National Academy of Sciences*. 2019;116(19):9469–74.
- 679 40. Balaesque P, Bowden GR, Adams SM, Leung HY, King TE, Rosser ZH, et al. A Predominantly  
680 Neolithic Origin for European Paternal Lineages. *PLOS Biology*. 2010;8(1):e1000285.
- 681 41. Lawson DJ, Hellenthal G, Myers S, Falush D. Inference of Population Structure using Dense  
682 Haplotype Data. Copenhaver GP, editor. *PLoS Genetics*. 2012;8(1):e1002453.
- 683 42. Gilbert E, O'Reilly S, Merrigan M, McGettigan D, Vitart V, Joshi PK, et al. The genetic landscape  
684 of Scotland and the Isles. *Proceedings of the National Academy of Sciences*. 2019;116(38): 19064-  
685 19070.

- 686 43. Byrne RP, Martiniano R, Cassidy LM, Carrigan M, Hellenthal G, Hardiman O, et al. Insular Celtic  
687 population structure and genomic footprints of migration. *PLoS Genetics*. 2018;14(1):1–22.
- 688 44. Oram R. *Domination and Lordship. Scotland 1070-1230*. Edinburgh: Edinburgh University  
689 Press; 2011.
- 690 45. Barrow GWS. *The Kingdom of the Scots, 2nd edn*. Edinburgh: Edinburgh University Press;  
691 2003.
- 692 46. Taylor S, Márkus G. *The Place-Names of Fife*. Donington: Shaun Tyas; 2012. p. 169–80.
- 693 47. Czére O, Fawcett J, Evans J, Sayle K, Müldner G, Hall M, et al. Multi-isotope analysis of the  
694 human skeletal remains from Blair Atholl, Perth and Kinross, Scotland. *Tayside and Fife Archaeological*  
695 *Journal*. 2021;27:31–44.
- 696 48. Czére O, Lawson JA, Müldner G, Evans J, Boyle A, Britton K. The Bodies in the ‘Bog’: A Multi-  
697 Isotope Investigation of Individual Life-Histories at an Unusual 6th/7th AD Century Group Burial from  
698 a Roman Latrine at Cramond, Scotland. *Archaeological and Anthropological Sciences*. 2022;14(4):67.
- 699 49. Winney B, Boumertit A, Day T, Davison D, Echeta C, Evseeva I, et al. People of the British Isles:  
700 Preliminary analysis of genotypes and surnames in a UK-control population. *European Journal of*  
701 *Human Genetics*. 2012;20(2):203–10.
- 702 50. Wells RS, Yuldasheva N, Ruzibakiev R, Underhill PA, Evseeva I, Blue-Smith J, et al. The Eurasian  
703 heartland: A continental perspective on Y-chromosome diversity. *Proceedings of the National*  
704 *Academy of Sciences of the United States of America*. 2001;98(18):10244–9.
- 705 51. Wilson JF, Weiss DA, Richards M, Thomas MG, Bradman N, Goldstein DB. Genetic evidence for  
706 different male and female roles during cultural transitions in the British Isles. *Proceedings of the*  
707 *National Academy of Sciences of the United States of America*. 2001;98(9):5078–83.

- 708 52. Capelli C, Redhead N, Abernethy JK, Gratrix F, Wilson JF, Moen T, et al. A Y chromosome census  
709 of the British Isles. *Current Biology*. 2003;13(11):979–84.
- 710 53. Goodacre S, Helgason A, Nicholson J, Southam L, Ferguson L, Hickey E, et al. Genetic evidence  
711 for a family-based Scandinavian settlement of Shetland and Orkney during the Viking periods.  
712 *Heredity*. 2005;95(2):129–35.
- 713 54. Oota H, Settheetham-Ishida W, Tiwawech D, Ishida T, Stoneking M. Human mtDNA and Y-  
714 chromosome variation is correlated with matrilocal versus patrilocal residence. *Nature Genetics*.  
715 2001;29(1):20–1.
- 716 55. Hamilton G, Stoneking M, Excoffier L. Molecular analysis reveals tighter social regulation of  
717 immigration in patrilocal populations than in matrilocal populations. *Proceedings of the National  
718 Academy of Sciences of the United States of America*. 2005;102(21):7476–7480.
- 719 56. Gunnarsdóttir ED, Nandineni MR, Li M, Myles S, Gil D, Pakendorf B, et al. Larger mitochondrial  
720 DNA than Y-chromosome differences between matrilocal and patrilocal groups from Sumatra. *Nature  
721 Communications*. 2011;2(1):1–7.
- 722 57. Tumonggor MK, Karafet TM, Downey S, Lansing JS, Norquest P, Sudoyo H, et al. Isolation,  
723 contact and social behavior shaped genetic diversity in West Timor. *Journal of Human Genetics*.  
724 2014;59(9):494–503.
- 725 58. Murdock GP, White DR. Standard Cross-Cultural Sample. *Ethnology*. 1969;8(4):329.
- 726 59. Evans N. Royal succession and kingship among the Picts. *Innes Review*. 2008;59(1):1–48.
- 727 60. Meyer M, Kircher M. Illumina sequencing library preparation for highly multiplexed target  
728 capture and sequencing. *Cold Spring Harbor Protocols*. 2010;5(6).



- 729 61. Rodríguez-Varela R, Günther T, Krzewińska M, Storå J, Gillingwater TH, MacCallum M, et al.  
730 Genomic Analyses of Pre-European Conquest Human Remains from the Canary Islands Reveal Close  
731 Affinity to Modern North Africans. *Current Biology*. 2017;27(21):3396-3402.
- 732 62. Schubert M, Lindgreen S, Orlando L. AdapterRemoval v2: rapid adapter trimming,  
733 identification, and read merging. *BMC Research Notes*. 2016;9(1):1–7.
- 734 63. Li H, Durbin R. Fast and accurate short read alignment with Burrows-Wheeler transform.  
735 *Bioinformatics*. 2009;25(14):1754–60.
- 736 64. Skoglund P, Malmström H, Omrak A, Raghavan M, Valdiosera C, Günther T, et al. Genomic  
737 diversity and admixture differs for stone-age Scandinavian foragers and farmers. *Science*.  
738 2014;344(6185):747–50.
- 739 65. Kircher M, Sawyer S, Meyer M. Double indexing overcomes inaccuracies in multiplex  
740 sequencing on the Illumina platform. *Nucleic Acids Research*. 2012;40(1):e3.
- 741 66. Jónsson H, Ginolhac A, Schubert M, Johnson PLF, Orlando L. mapDamage2 .0: fast approximate  
742 Bayesian estimates of ancient DNA damage parameters. *Bioinformatics*. 2013;29(13):1682–4.
- 743 67. Renaud G, Slon V, Duggan AT, Kelso J. Schmutzi: Estimation of contamination and endogenous  
744 mitochondrial consensus calling for ancient DNA. *Genome Biology*. 2015;16(1):1–18.
- 745 68. Korneliussen TS, Albrechtsen A, Nielsen R. ANGSD: Analysis of Next Generation Sequencing  
746 Data. *BMC Bioinformatics*. 2014;15(356).
- 747 69. Howe KL, Achuthan P, Allen J, Allen J, Alvarez-Jarreta J, Amode MR, et al. Ensembl 2021.  
748 *Nucleic Acids Research*. 2021;49(D1):D884–91.
- 749 70. Skoglund P, Storå J, Götherström A, Jakobsson M. Accurate sex identification of ancient human  
750 remains using DNA shotgun sequencing. *Journal of Archaeological Science*. 2013; 40(12):4477-82.

- 751 71. Weissensteiner H, Pacher D, Kloss-Brandstätter A, Forer L, Specht G, Bandelt HJ, et al.  
752 HaploGrep 2: mitochondrial haplogroup classification in the era of high-throughput sequencing.  
753 *Nucleic Acids Research*. 2016;44(1):58-63.
- 754 72. Martiniano R, De Sanctis B, Hallast P, Durbin R. Placing Ancient DNA Sequences into Reference  
755 Phylogenies. *Molecular Biology and Evolution*. 2022;39(2):msac017.
- 756 73. Patterson N, Moorjani P, Luo Y, Mallick S, Rohland N, Zhan Y, et al. Ancient admixture in human  
757 history. *Genetics*. 2012;192(3):1065–93.
- 758 74. Alexander DH, Novembre J. Fast Model-Based Estimation of Ancestry in Unrelated Individuals.  
759 *Genome Research*. 2009;19(9):1655–64.
- 760 75. Petr M, Vernot B, Kelso J. admixr—R package for reproducible analyses using ADMIXTOOLS.  
761 *Bioinformatics*. 2019;35(17):3194–5.
- 762 76. Rubinacci S, Ribeiro DM, Hofmeister RJ, Delaneau O. Efficient phasing and imputation of low-  
763 coverage sequencing data using large reference panels. *Nature Genetics*. 2021;53(1):120–6.
- 764 77. Damgaard PB, Marchi N, Rasmussen S, Peyrot M, Renaud G, Korneliussen T, et al. 137 ancient  
765 human genomes from across the Eurasian steppes. *Nature*. 2018;557(7705):369–74.
- 766 78. Ebenesersdóttir SS, Sandoval-Velasco M, Gunnarsdóttir ED, Jagadeesan A, Guðmundsdóttir  
767 VB, Thordardóttir EL, et al. Ancient genomes from Iceland reveal the making of a human population.  
768 *Science*. 2018;360(6392):1028–32.
- 769 79. Browning BL, Tian X, Zhou Y, Browning SR. Fast two-stage phasing of large-scale sequence  
770 data. *The American Journal of Human Genetics*. 2021;108(10):1880–90.
- 771 80. Auton A, Abecasis GR, Altshuler DM, Durbin RM, Abecasis GR, Bentley DR, et al. A global  
772 reference for human genetic variation. *Nature*. 2015;526(7571):68–74.

- 773 81. International Multiple Sclerosis Genetics Consortium, Wellcome Trust Case Control  
774 Consortium 2, Sawcer S, Hellenthal G, Pirinen M, Spencer CCA, et al. Genetic risk and a primary role  
775 for cell-mediated immune mechanisms in multiple sclerosis. *Nature*. 2011;476(7359):214–9.
- 776 82. Purcell S, Neale B, Todd-Brown K, Thomas L, Ferreira MAR, Bender D, et al. PLINK: A Tool Set  
777 for Whole-Genome Association and Population-Based Linkage Analyses. *The American Journal of*  
778 *Human Genetics*. 2007;81(3):559–75.
- 779 83. Chang CC, Chow CC, Tellier LCAM, Vattikuti S, Purcell SM, Lee JJ. Second-generation PLINK:  
780 Rising to the challenge of larger and richer datasets. *GigaScience*. 2015;4(1):7.
- 781 84. Browning BL, Browning SR. Improving the Accuracy and Efficiency of Identity-by-Descent  
782 Detection in Population Data. *Genetics*. 2013;194(2):459–71.
- 783 85. Browning SR. Estimation of Pairwise Identity by Descent From Dense Genetic Marker Data in  
784 a Population Sample of Haplotypes. *Genetics*. 2008;178(4):2123.
- 785 86. Helgason A, Hrafnkelsson B, Gulcher JR, Ward R, Stefánsson K. A Populationwide Coalescent  
786 Analysis of Icelandic Matrilineal and Patrilineal Genealogies: Evidence for a Faster Evolutionary Rate  
787 of mtDNA Lineages than Y Chromosomes. *The American Journal of Human Genetics*. 2003.72(6):1370–  
788 88.
- 789 87. QGIS Development Team. QGIS Geographic Information System. 2020. Available from:  
790 <http://qgis.osgeo.org>
- 791 88. Li N, Stephens M. Modeling linkage disequilibrium and identifying recombination hotspots  
792 using single-nucleotide polymorphism data. *Genetics*. 2003;165(4):2213–33.
- 793

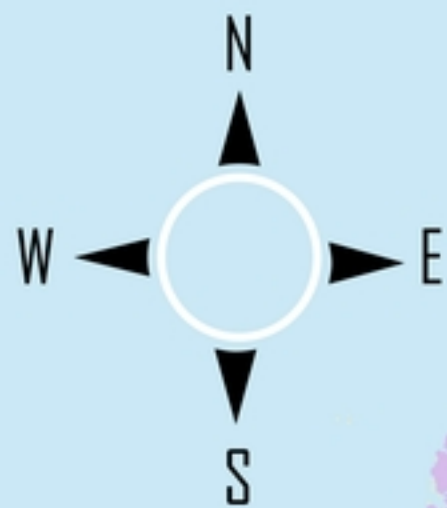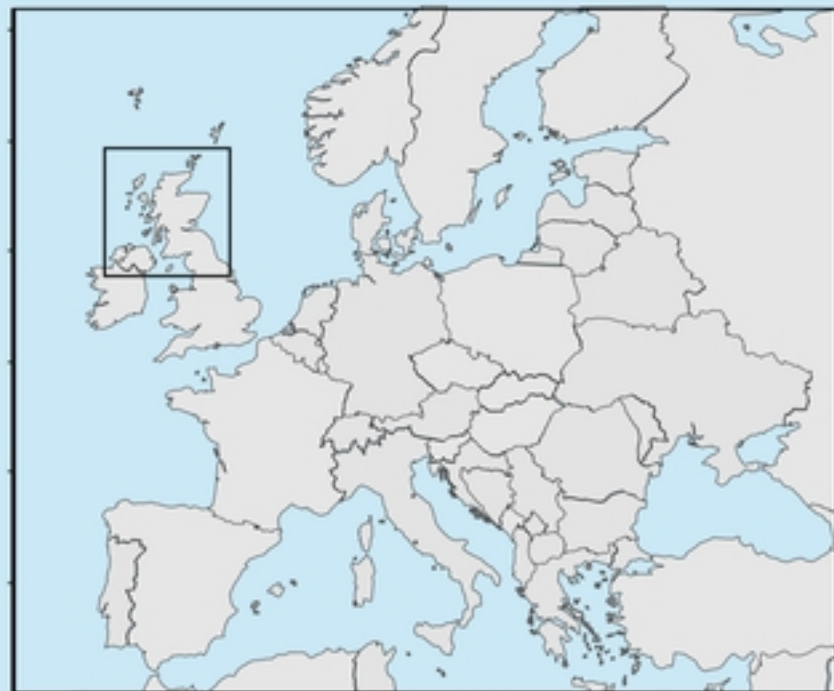

Balintore

Lundin Links

Picts

Britons

Anglo-Saxons

Gaels (Dál Riata)

Gaels

0 50 100 km

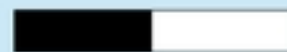

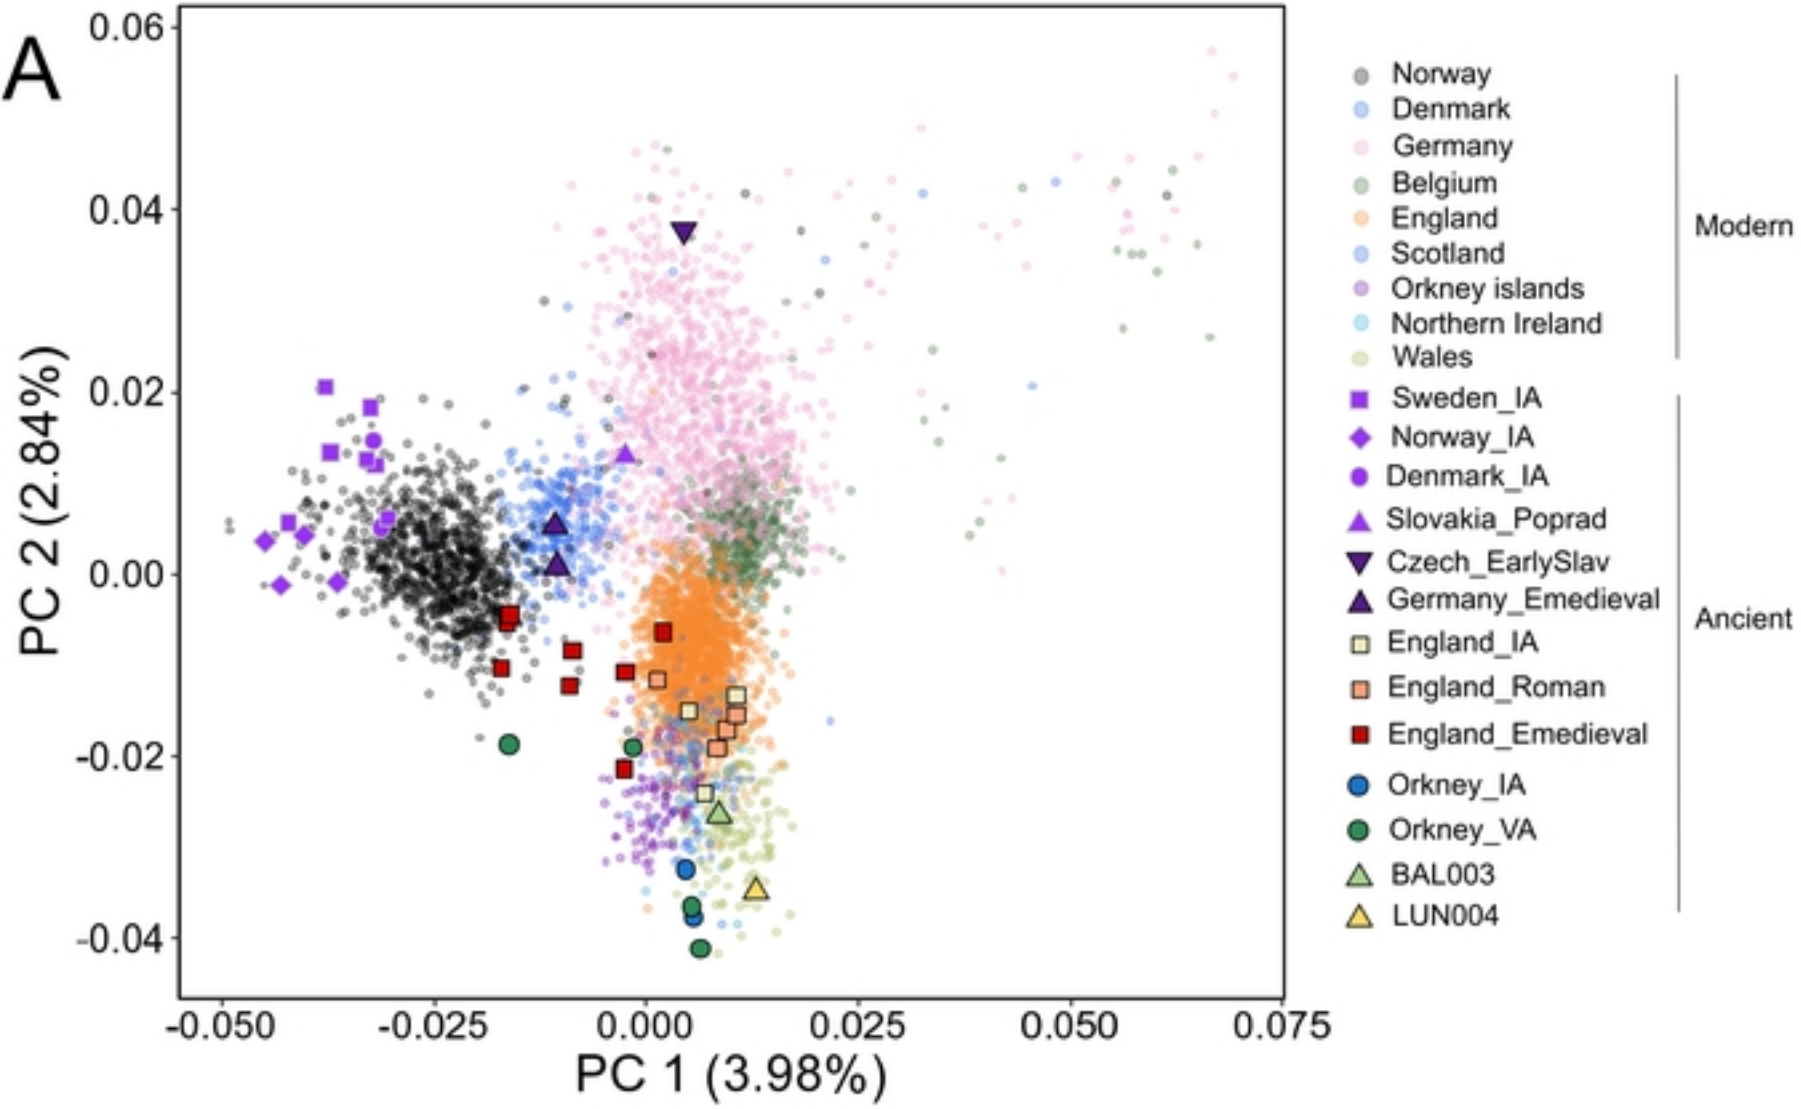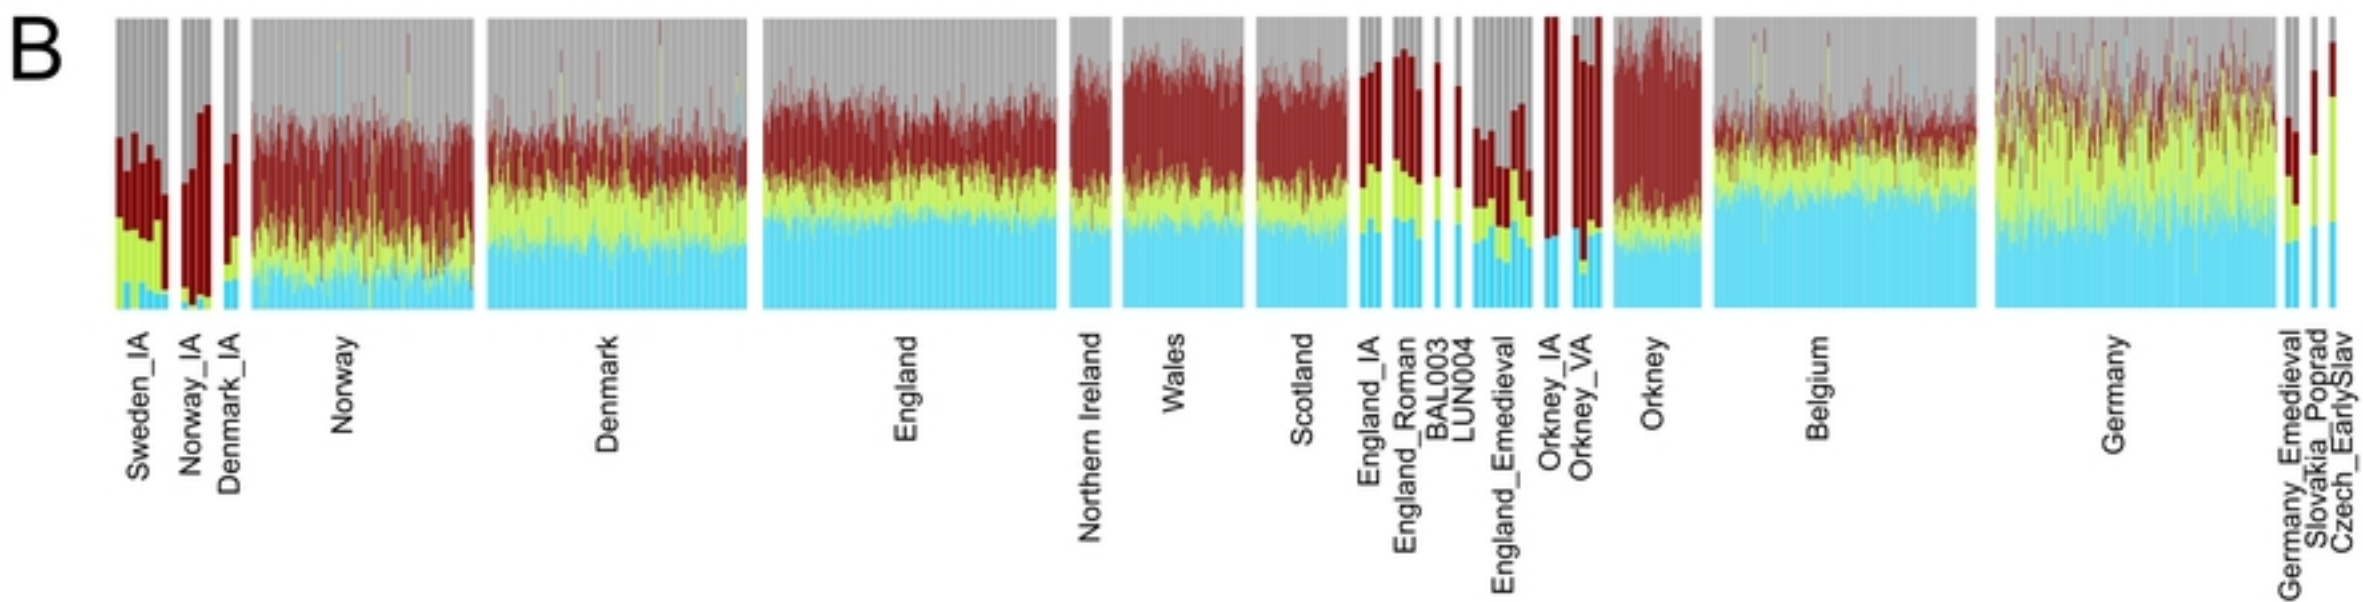



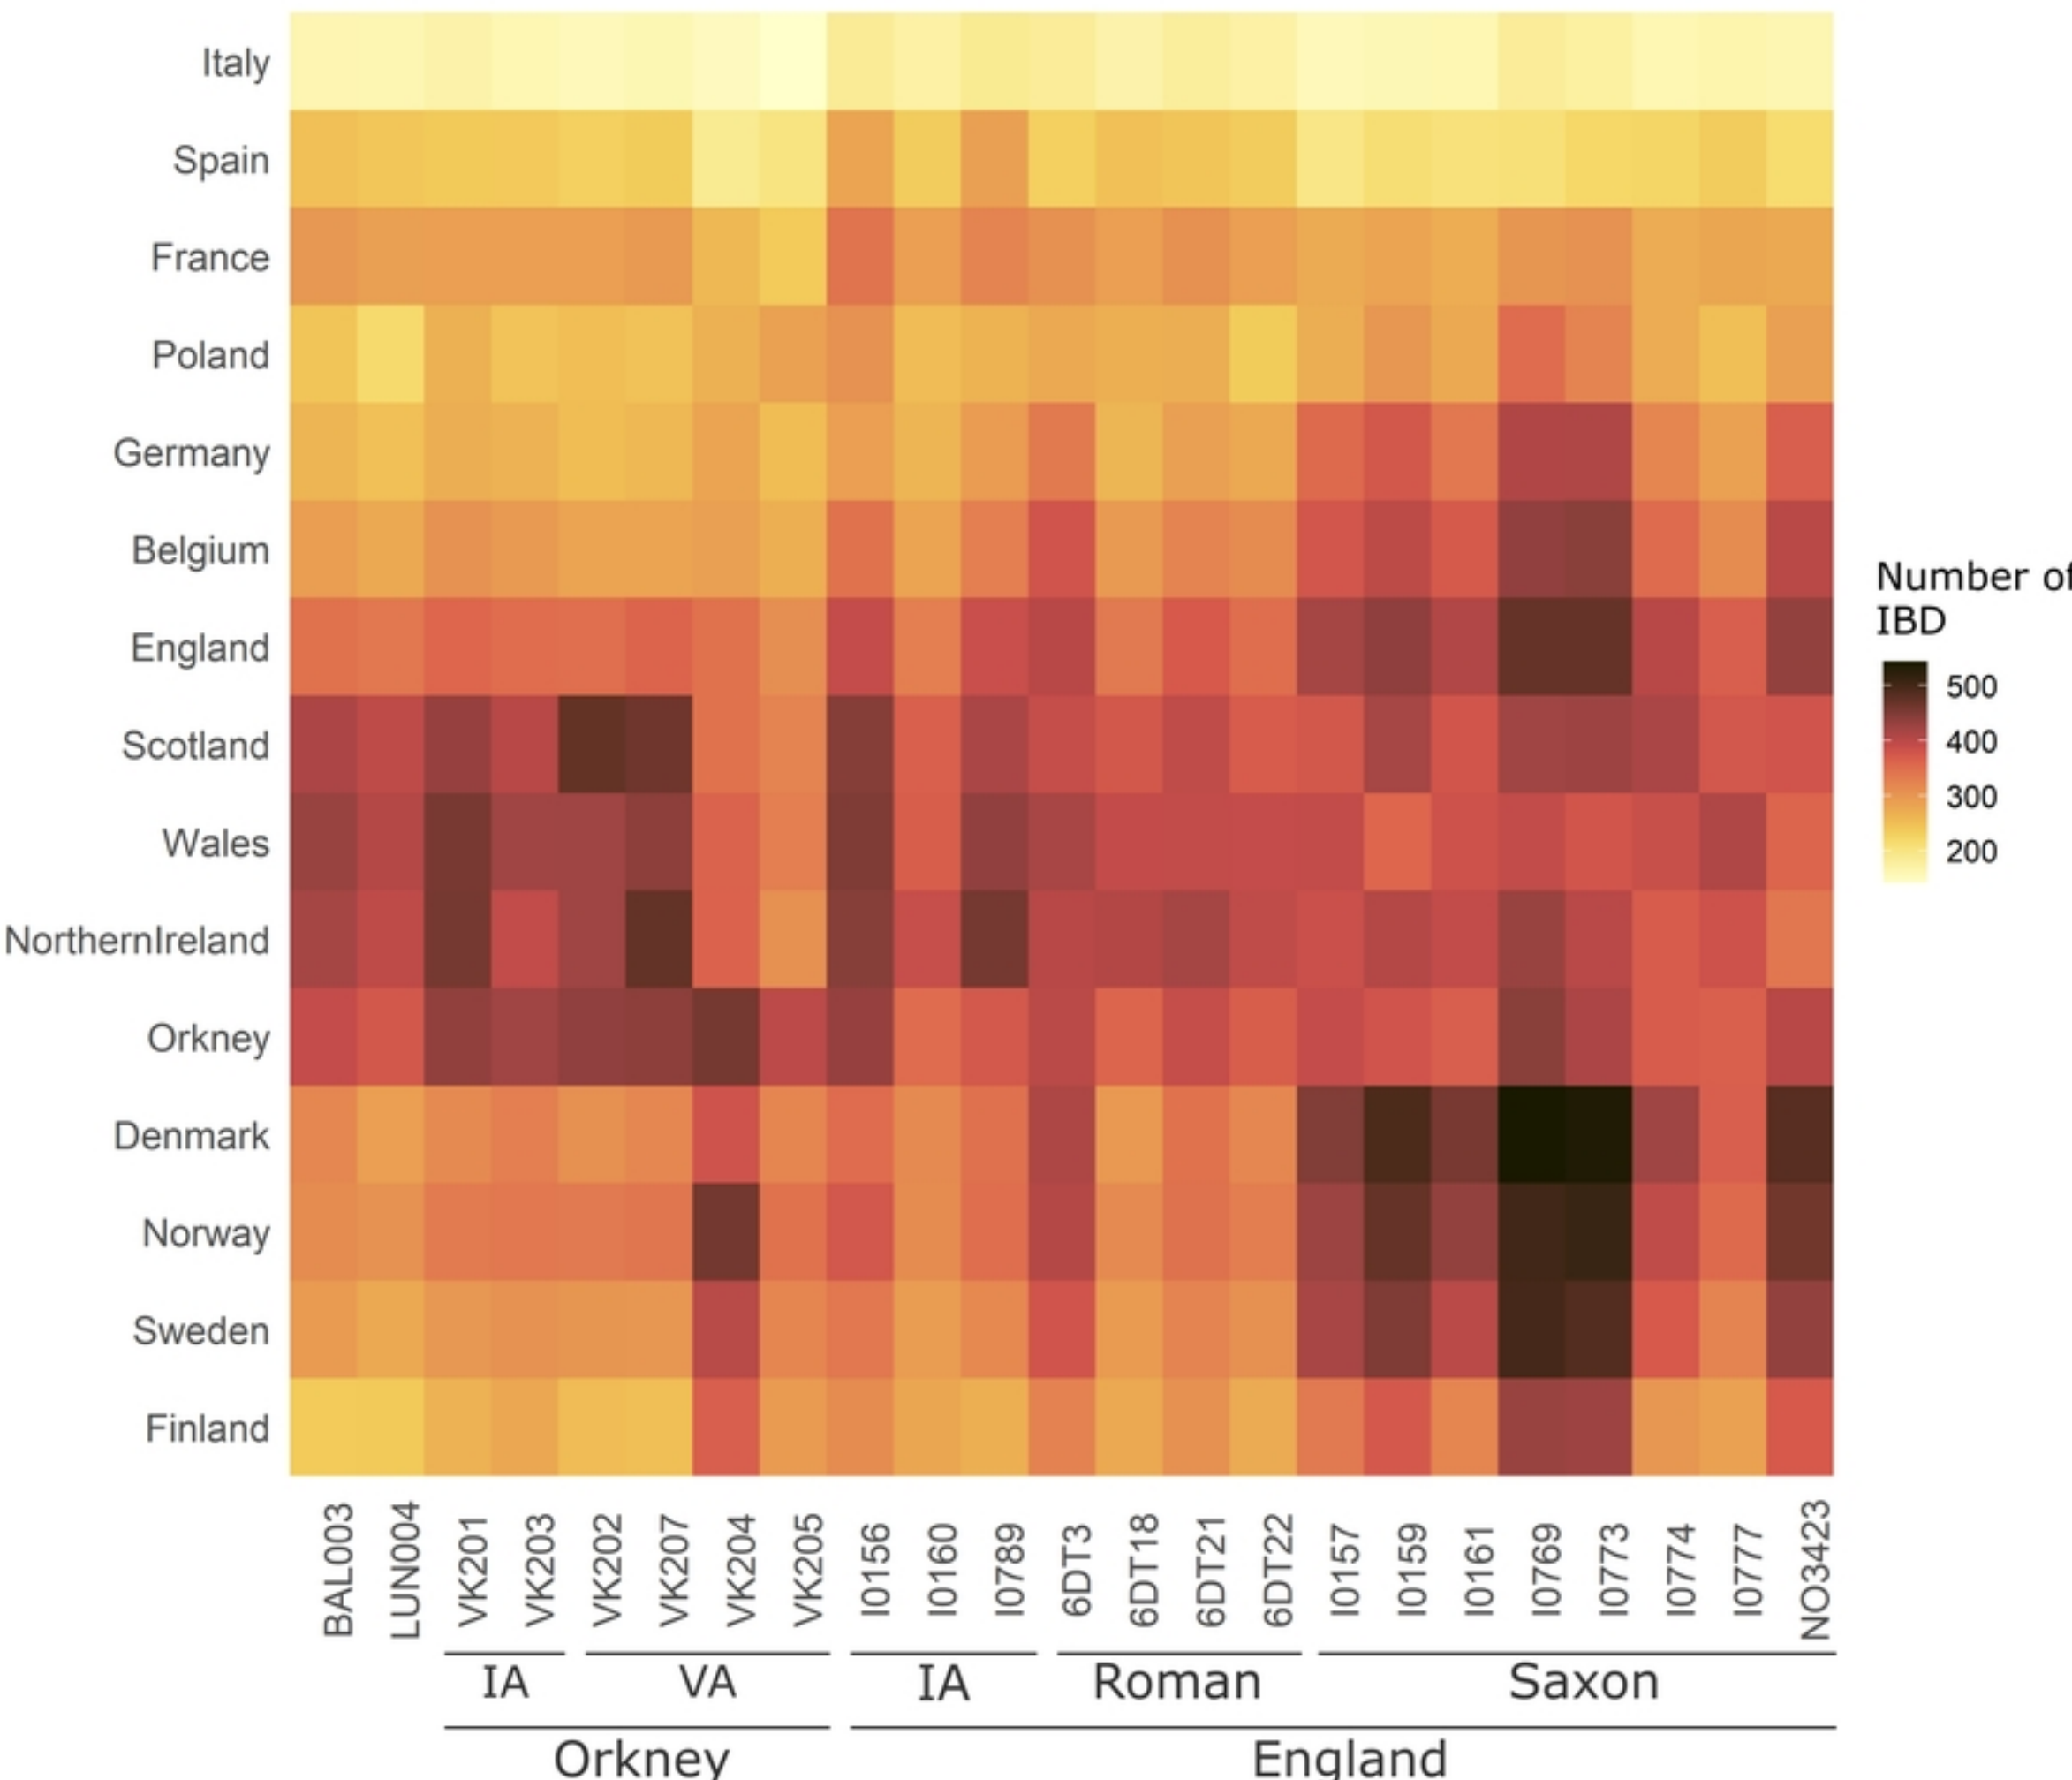

BAL003 and LUN004

Iron Age Orkney

Viking Age Orkney

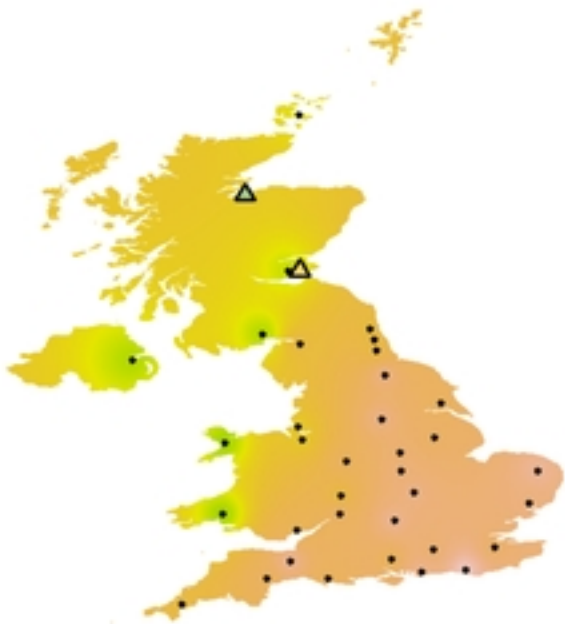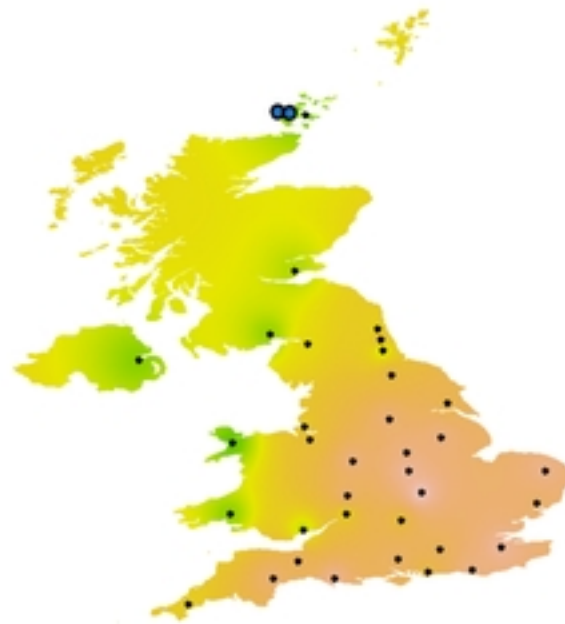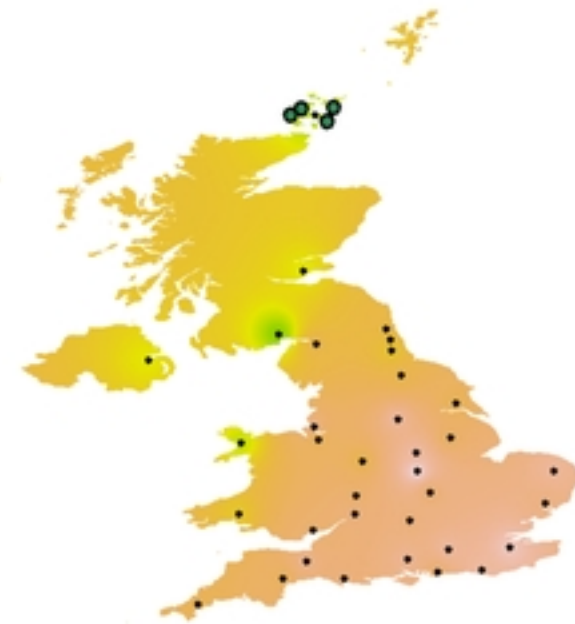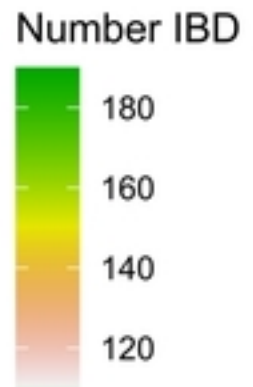

Iron Age England

Roman period England

Early medieval England

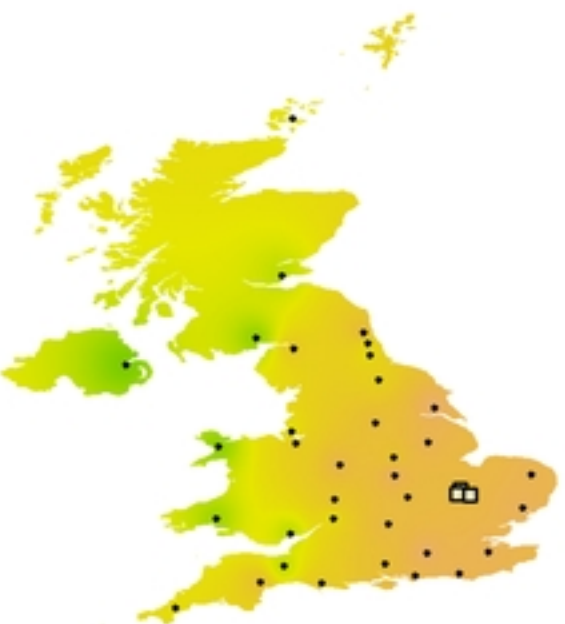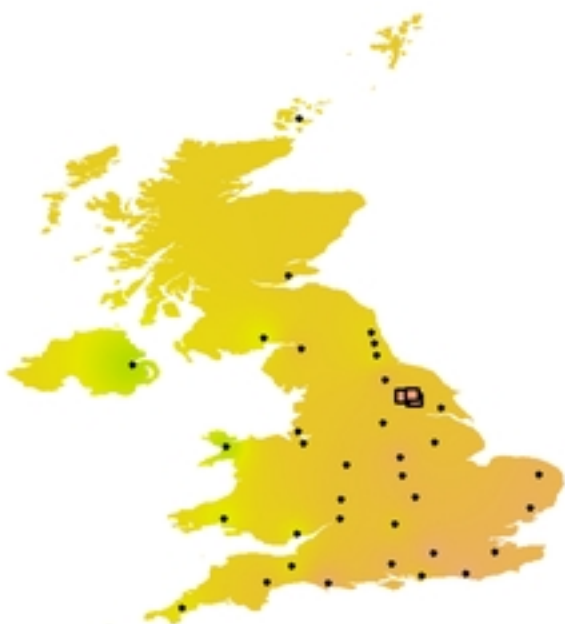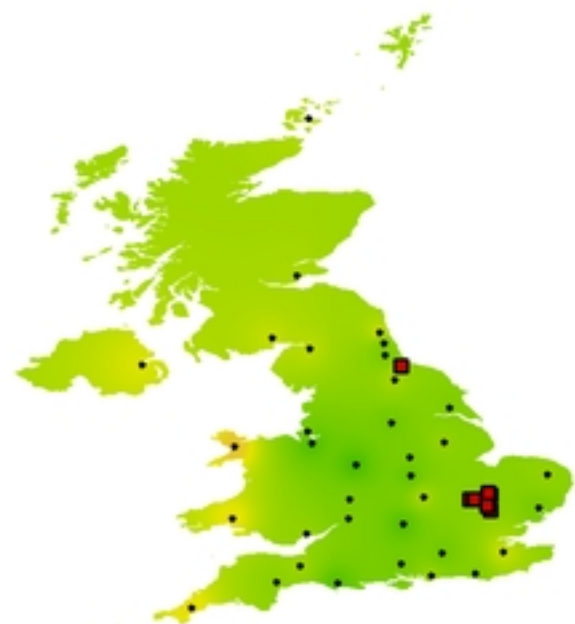

Source: https://www.biorxiv.org/content/10.1101/2022.08.01.502257v1.full.pdf
